1 **TITLE**

2 Endospores and other lysis-resistant bacteria comprise a widely shared core community  
3 within the human microbiota

4

5 **AUTHORS**

6 Sean M. Kearney<sup>1,2,3</sup>, Sean M. Gibbons<sup>1,2,3</sup>, Mathilde Poyet<sup>1,2,3</sup>, Thomas Gurry<sup>1,2,3</sup>,  
7 Kevin Bullock<sup>2</sup>, Jessica R. Allegretti<sup>4,5</sup>, Clary B. Clish<sup>2</sup>, Eric J. Alm<sup>1,2,3,\*</sup>

8 <sup>1</sup> Department of Biological Engineering, Massachusetts Institute of Technology,  
9 Cambridge, MA, U.S.A.

10 <sup>2</sup> The Broad Institute, Cambridge, MA, U.S.A.

11 <sup>3</sup> The Center for Microbiome Informatics and Therapeutics, Cambridge, MA, U.S.A.

12 <sup>4</sup> Division of Gastroenterology, Brigham and Women's Hospital, Boston, MA, USA

13 <sup>5</sup> Harvard Medical School, Boston, MA, USA

14 \* Corresponding author: [ejalm@mit.edu](mailto:ejalm@mit.edu)

15

16 **ABSTRACT**

17

18 Endospore-formers in the human microbiota are well adapted for host-to-host  
19 transmission, and an emerging consensus points to their role in determining health and  
20 disease states in the gut. The human gut, more than any other environment,  
21 encourages the maintenance of endospore formation, with recent culture-based work  
22 suggesting that over 50% of genera in the microbiome carry genes attributed to this  
23 trait. However, there has been limited work on the ecological role of endospores and  
24 other stress-resistant cellular states in the human gut. In fact, there is no data to  
25 indicate whether organisms with the genetic potential to form endospores actually form  
26 endospores *in situ* and how sporulation varies across individuals and over time. Here,  
27 we applied a culture-independent protocol to enrich for endospores and other stress-  
28 resistant cells in human feces to identify variation in these states across people and  
29 within an individual over time. We see that cells with resistant states are more likely  
30 than those without to be shared among multiple individuals, which suggests that these  
31 resistant states are particularly adapted for cross-host dissemination. Furthermore, we  
32 use untargeted fecal metabolomics in 24 individuals and within a person over time to  
33 show that these organisms respond to shared environmental signals, and in particular,  
34 dietary fatty acids, that likely mediate colonization of recently disturbed human guts.

35

36

37

38

## 39 INTRODUCTION

40

41 To date, there is limited work investigating the relevance of stress-resistant cellular  
42 states in the propagation, survival, and function of organisms in the mammalian  
43 gastrointestinal (GI) tract. The gut is the only known environment with such a  
44 considerable abundance of organisms that form endospores, considered the most  
45 stress-resistant of all cell-types (Filippidou *et al.*, 2015). Anaerobic, endospore-forming  
46 Firmicutes are numerically dominant members of the GI tract of most animal species  
47 (Browne *et al.*, 2016; Ley *et al.*, 2008). Within this group of organisms, the presence of  
48 genes for endospore formation suggests that growth in the GI tract favors the  
49 maintenance of this large gene repertoire (Browne *et al.*, 2016). The apparent utility of  
50 these genes is to allow organisms to enter metabolically dormant states that aid in  
51 survival and transmission to new hosts. Passage through the GI tract is likely to trigger  
52 sporulation (Angert and Losick, 1998; Flint *et al.*, 2005), but the mechanisms by which  
53 this process occurs and the signals that induce sporulation here are mostly unknown,  
54 even for well-studied pathogens like *Clostridioides difficile*.

55

56 Many endospore-forming organisms in the human gut are in the class Clostridia, the  
57 most well-studied of which are the pathogens *C. difficile* and *Clostridium perfringens*  
58 (Alexander *et al.*, 1995; Paredes-Sabja *et al.*, 2008). However, Clostridia also includes  
59 abundant organisms not known to form endospores, like *Faecalibacterium prausnitzii*  
60 (Sokol *et al.*, 2008) and *Roseburia intestinalis* (Png *et al.*, 2010). For *C. difficile*, the role  
61 of sporulation is central to disease etiology (Deakin *et al.*, 2012), particularly in patients

62 who experience recurrence. Sporulation and rising levels of antibiotic resistance allow  
63 *C. difficile* to persist in the face of antibiotic assault, ensuring that it remains in the  
64 environment to rapidly re-colonize its host.

65

66 Among Clostridia that do not cause disease, multiple strains of endospore-forming  
67 organisms have the capacity to induce T regulatory cells and associated anti-  
68 inflammatory cytokines (Atarashi *et al.*, 2011, 2013) involved in sensitivity to, for  
69 example, peanut antigen (Stefka *et al.*, 2014). These organisms have recently been  
70 shown to provide pathogen resistance in neonatal mice (Kim *et al.*, 2017). Similarly,  
71 endospore-forming commensals of the murine GI tract have a central role in mediating  
72 the induction of a Th17-type T helper cell response (Ivanov *et al.*, 2009; Kuwahara *et al.*  
73 *et al.*, 2011; Sczesnak *et al.*, 2011). Many Clostridia also produce butyrate as an end-  
74 product of metabolism, which can regulate how immune cells interact with gut  
75 commensal bacteria (Smith *et al.*, 2013; Furusawa *et al.*, 2013; Van den Abbeele *et al.*,  
76 2013; Eeckhaut *et al.*, 2011; Louis *et al.*, 2010). This group of organisms also boosts  
77 production of serotonin by enterochromaffin cells in the intestine, crucial for motility in  
78 the gut (Yano *et al.*, 2015). An ecological understanding of sporulation and induction of  
79 other resistant states could be informative for how these phenotypes interact with host  
80 immunity. For example, such an understanding could inform whether inflammation acts  
81 positively or negatively on endospore formation, or whether endospores themselves  
82 have immunomodulatory effects.

83

84 Resistant cellular states like endospores appear to be adaptive in the mammalian gut  
85 environment. It is likely that other non-endospore-forming taxa have evolved analogous  
86 resistance strategies for passing between hosts. Persister states may allow non-  
87 endospore-forming organisms to enter a metabolically inert state upon exit from the  
88 gastrointestinal tract. Toxin-antitoxin systems, associated with persistence in *E. coli*, are  
89 overrepresented in Bacteroidetes, Alpha- and Gammaproteobacteria (Makarova *et al.*,  
90 2009), and Bacteroidetes are among the most metabolically inactive cells in human  
91 fecal samples (Maurice *et al.*, 2013). Further, viable but nonculturable cell (VBNC)  
92 states may enable passage through the environment by reducing metabolic needs and  
93 affecting cell wall and membrane composition and morphology (Li *et al.*, 2014). These  
94 strategies and others not yet studied may play an important role in mediating cross-host  
95 bacterial transmission.

96  
97 Environmental stress resistance protects cells faced with unfavorable conditions. The  
98 signals triggering resistance are likely quite varied. Even for well-studied endospore-  
99 forming bacteria, inducing sporulation *in vitro* can be difficult, and across strains of one  
100 species, signals that induce sporulation in one strain may be insufficient to induce  
101 sporulation in others (Kaplan and Williams, 1941). Further, even organisms that  
102 abundantly form endospores in their native environment may not do so under conditions  
103 permitting vegetative growth. For instance, *Paenibacillus larvae* in honeybees will only  
104 form endospores *in vitro* under idiosyncratic conditions designed to mimic the host  
105 environment (Dingman and Stahly, 1983). Similarly, certain strains of *Clostridium*  
106 *perfringens* rarely form endospores *in vitro* unless exposed to a specific set of

107 environmental stressors (Kaplan and Williams, 1941). The discrepancy in phenotype of  
108 organisms in their native environments compared to *in vitro* argues for culture-free  
109 approaches to investigate such phenotypes *in situ*. Enriching for stress-resistant cells in  
110 environmental samples provides a means to uncover the actual context in which these  
111 states form.

112

113 Here, we investigate which organisms are present as endospores or as other resistant  
114 cell types in the human gastrointestinal tract. We modified previously described  
115 methods to enrich fecal samples for endospores and obtain paired bulk community and  
116 resistant fraction 16S rDNA sequence data for 24 healthy individuals and one individual  
117 across 24 days. We consistently enriched for putatively endospore-forming taxa in all  
118 samples, as well as other taxa, predominantly from the Actinobacteria phylum, that  
119 show high levels of lysis resistance. We compared resistant OTUs (rOTUs) and non-  
120 resistant OTUs (nOTUs) to identify ecological characteristics differing between these  
121 groups. Using a database of rOTUs identified in this study, we find consistent signals for  
122 these organisms in their responses to a variety of successional states across multiple  
123 independent data sets from prior published studies (Supplementary Table 7). Overall,  
124 we show a tight association between the ecological role of these resistant organisms  
125 and their distribution within and across human hosts.

126

## 127 **RESULTS AND DISCUSSION**

128

129 *Sequencing resistant fraction reveals resistant taxa present in human feces*

130

131 We modified a culture-independent method (Wunderlin *et al.*, 2014) to generate  
132 resistant fraction 16S rDNA amplicon data from human feces (Figure 1A). This method  
133 entails a series of lysis treatments including heating, lysozyme and proteinase  
134 treatment, alkaline and SDS treatment, and hypotonic wash steps followed by DNase  
135 treatment. We extract the resultant resistant fraction pellet alongside the bulk  
136 community sample using a bead-beating protocol (see Methods). We validated this  
137 method on pure bacterial cultures and endospore cultures prior to treatment of human  
138 fecal samples (Supplementary Figure 2) and conducted a small study to validate the  
139 reproducibility of the method across samples (Supplementary Table 5). We then  
140 proceeded to test the method on feces from a healthy human cohort and from a time  
141 series of a single individual.

142

143 When aggregating the fecal data across our cohort, we see expansion of classes with  
144 known endospore-formers in the resistant fraction: Clostridia, Erysipelotrichia, and  
145 Bacilli (Figure 1B). We also see depletion of classes lacking endospore-formers  
146 (Bacteroidia, Betaproteobacteria, Verrucomicrobia, Gammaproteobacteria). Organisms  
147 in the class Actinobacteria were enriched in the resistant fraction, but lack genes  
148 considered essential for endospore formation. Although exospore formation is well  
149 documented in some families of Actinobacteria (e.g. Actinomycetaceae and  
150 Streptomycetaceae), these families have only modest representation in our data. We  
151 see high-level resistance primarily from *Bifidobacterium* and *Collinsella*, whose

152 representative genomes lack orthologs for genes thought to be essential to exospore  
153 formation.

154

155 We suspect that high level resistance in the Actinobacteria is mediated primarily by  
156 resistance to lysozyme conferred by cell wall structures common to Actinobacteria  
157 (Sekar *et al.*, 2003). Lysozyme is one of the most common and important defense  
158 mechanisms used by neutrophils, monocytes, macrophages, and epithelial cells  
159 (Fahlgren *et al.*, 2003; Keshav *et al.*, 1991). It is abundant in human milk, a source of  
160 *Bifidobacterium* species transferred to breast-feeding infants, and in saliva and mucus,  
161 where it serves an antibacterial role (Gueimonde *et al.*, 2007). Attempts to deplete  
162 Actinobacteria with achromopeptidase, which has previously been shown to break down  
163 Actinobacterial peptidoglycan, had variable efficacy across samples (data not shown).  
164 Thus, factors other than cell wall structure may contribute to Actinobacteria resistance.

165

166 To quantify the extent of lysis resistance, we calculated the proportion of normalized  
167 reads for each sequence variant in the resistant fraction to the sum of its reads in the  
168 bulk community and the resistant fraction. We then obtain a finite quantity even for  
169 organisms not observed in one of the paired samples. When the proportion exceeds 0.5  
170 we call an OTU enriched in the resistant fraction (Figure 1A). An OTU that is enriched in  
171 at least one of the samples in which it is present is considered a resistant OTU (rOTU),  
172 and non-resistant (nOTU) otherwise. Using the above definitions, all of the rOTUs are  
173 either Firmicutes or Actinobacteria (Figure 1C). In fact, when grouping OTUs at the



174 genus level, the top two most enriched genera (*Bifidobacterium*, *Collinsella*) are both  
175 Actinobacteria.

176

177 *Resistant fractions consist of few dominant and many rare OTUs*

178

179 In order to investigate ecological properties of the resistant cell fraction, we first  
180 examined the community structure of resistant fractions and compared these to their  
181 bulk community counterparts. After rarefying to the minimum read depth (28639 reads,  
182 Supplementary Table 6), we find that resistant fractions are significantly less diverse  
183 both in species richness and evenness than their bulk community counterparts (Figure  
184 2A). As we are sampling a subset of the community, this result is not necessarily  
185 surprising. However, reduced evenness of the resistant fraction compared to the bulk  
186 community suggests dominance of a few organisms coupled with many low abundance  
187 organisms. This difference in community structure could entail that resistant fractions  
188 are more dissimilar from each other than their bulk community counterparts. Instead,  
189 the compositions using Jaccard Distance of resistant fractions tend to be more similar to  
190 each other than bulk communities to each other across different people (PERMANOVA  
191 p-value < 0.001, Figure 2B). Similarly, using Jensen-Shannon Divergence, resistant  
192 fractions cluster together separately from bulk communities implying that resistant  
193 fractions may assemble in similar ways across people (Figure 2C). We hypothesized  
194 that the coherence between resistant fractions may lead to increased prevalence of  
195 organisms found in the resistant fraction across people.

196

197 *rOTUs are more shared than nOTUs among individuals*

198

199 To test the hypothesis that resistant states contribute to prevalence, we examined the  
200 frequency with which rOTUs were found among the bulk communities across individuals  
201 compared to nOTUs (Figure 2D). First, nOTUs, which are never enriched in the  
202 resistant fraction, are significantly less likely to be shared among multiple individuals  
203 than rOTUs (Mann Whitney U Test comparing the distribution of the number of  
204 individuals sharing each rOTU to the number of individuals sharing each nOTU, p-value  
205 =  $1e-36$ ). We again see this result by calculating the correlation between the frequency  
206 of resistance (the number of times an organism is enriched in the resistant fraction  
207 divided by the number of times it is observed) and sharedness (number of individuals an  
208 OTU is observed in divided by the total number of individuals), giving a weak, but  
209 positive and highly significant correlation (Spearman rho, correlation = 0.23, p-value =  
210  $1e-17$ ; Kendall tau, correlation = 0.19, p-value =  $1e-17$ ). Finally, when we compare the  
211 proportion of rOTUs found in only one person compared to multiple people with that  
212 proportion for nOTUs in bulk communities, we find rOTUs are about four times as likely  
213 to be found in multiple individuals (Fisher Exact Test, p-value =  $1e-33$ , odds ratio = 4.0).

214

215 These results suggests that organisms that do not form resistant states are less likely to  
216 be found across multiple individuals than those that do. Yet, rOTUs tend to be less  
217 dominant members of the community (median rOTUs = 13.5 counts, median nOTUs =  
218 18 counts, Mann-Whitney U Test, p-value = 0.004). Even though rOTUs are not as  
219 dominant as nOTUs, they are more widespread within this cohort.

220

221 *Representation of organisms in resistant fractions is heterogeneous across and within*  
222 *individuals*

223

224 We suspected that the increased prevalence of rOTUs might indicate positive selection  
225 on resistance capabilities in this environment. Variation in this trait among related  
226 organisms could be indicative of selection. In order to visualize how much of a  
227 population is present in a resistant state within a given sample, we scaled 16S rDNA  
228 abundance data using V4 16S rDNA qPCR-based estimates of community size  
229 (Supplementary Figure 1, Supplementary Table 6, and Supplementary Text) and  
230 defined the resistant fraction as the ratio of these scaled reads for each OTU. We plot  
231 this quantity on a phylogeny representing 99% OTUs (clustered at 99% nucleotide ID  
232 using usearch (Edgar, 2010)) present in at least 8 individuals and up to 24 individuals  
233 (Figure 3). First, we note the high variability in the resistant fraction within and across  
234 taxa (the average variation is over 50-fold within each taxon). For one *Roseburia* 99%  
235 OTU in particular, this quantity varies over 3 orders of magnitude, suggesting this OTU  
236 contains organisms present in a resistant state in some individuals, but not in others.

237

238 Furthermore, within a person, OTUs with the same genus classification can be  
239 discordant in their degree of resistance. In the individual time series, for example, one  
240 *Ruminococcus* 100% OTU is almost always enriched, and another is never enriched  
241 (Supplementary Figure 3). The closest matching genomes to these two organisms show  
242 differences in sporulation gene content, with the resistant *Ruminococcus* sharing 48/58

243 core sporulation genes (Galperin *et al.*, 2012), and the non-resistant only 41/58  
244 (Supplementary Figure 4 and Supplementary Tables 1 and 4). We also see that spore  
245 maturation proteins *spmA* and *spmB* vary in their presence in genomes of genera with  
246 variable enrichment phenotypes. These genes are involved in spore cortex dehydration  
247 and heat resistance in *B. subtilis* and *C. perfringens*, so their loss might contribute to  
248 differences in the recovery of resistant cells in this work.

249

250 The process of entering a resistant state itself might be selected on in this system.  
251 There is evidence that the sporulation phenotype is evolving in mammalian guts, as  
252 several gut isolates of *B. subtilis* lack genes that negatively regulate sporulation  
253 compared to their laboratory counterparts (Serra *et al.*, 2014). Knowing which  
254 organisms can form resistant cells in a community does not provide complete  
255 information about which organisms do (see supplementary results). Formation of  
256 resistant states *in vivo* seems to be highly context dependent. We also note that loss of  
257 a single gene (i.e. *spo0A*) in *C. difficile* is sufficient for loss of sporulation, such that  
258 retaining endospore formation requires strong purifying selection.

259

260 *rOTUs share signals for growth within an individual*

261

262 Previous evidence has shown that bile acids contribute to outgrowth of *C. difficile*  
263 endospores *in vivo* (Francis *et al.*, 2013). As taurocholate is a known germinant for  
264 several endospore-forming species (Browne *et al.*, 2016), we wondered whether  
265 endospore-formers and resistant organisms more broadly would share dynamic

266 behavior over time, suggesting coherent responses to environmental signals. We  
267 compared the Euclidean distance of correlation profiles between organisms to  
268 determine whether there were differences between the correlation profiles of rOTUs and  
269 nOTUS (Figure 4A). We find that rOTUs are more similar in their correlation profiles  
270 than nOTUs (PERMANOVA,  $p < 0.001$ ). The average correlation between rOTUs in the  
271 time series to each other is 0.211 compared to 0.162 for nOTUs to each other (Wilcox  
272 rank sum test,  $p$ -value =  $5e-08$ ): strong correlated behavior in this person associated  
273 primarily with rOTUs (Figure 4A). We interpret this result to mean that the dynamic  
274 behavior of rOTUs is more strongly coupled: these OTUs respond coherently to  
275 environmental signals.

276

277 *rOTUs link growth to fatty acid metabolism*

278

279 To address whether bile-related signals relate to the dynamics of rOTUs in the time  
280 series, we conducted untargeted metabolomics with standards for fatty acid  
281 metabolism. We then calculated the Spearman correlations between the median  
282 abundance profile of all OTUs clustering with the highly correlated rOTUs and  
283 metabolites for which we had standard markers. This cluster tends to correlate  
284 positively with long-chain saturated fatty acids, and negatively with long-chain  
285 polyunsaturated fatty acids and, notably, taurocholate (Supplementary Table 2). An  
286 OTU in the genus *Bilophila*, known to use taurocholate for sulfite reduction (Devkota *et*  
287 *al.*, 2012) also clusters with these organisms, and shows a strong relationship to  
288 markers of milkfat consumption (see supplementary text). We suspect that taurocholate

289 metabolism by members of this group drives down the concentration of taurocholate in  
290 stool. Additionally, saturated fatty acid concentration in the stool measures fatty acids  
291 escaping absorption in the small intestine. This process would be negatively impacted  
292 by microbial metabolism of taurocholate, as it more efficiently emulsifies saturated fats  
293 than glycine-conjugated primary bile acids (Devkota *et al.*, 2012). Fecal concentrations  
294 of taurocholate reflect secretion of unmetabolized taurocholate, which should increase if  
295 taurocholate metabolism by the gut microbiota decreases.

296

297 *Resistant cells lose resistance in response to physiological bile acid concentrations*

298

299 As a more direct test of the coupling of rOTUs to bile acid concentration, we dosed  
300 ethanol-treated feces (to kill vegetative cells without the additional harshness of the  
301 resistant fraction DNA enrichment protocol) with increasing concentrations of bovine bile  
302 in aqueous solution. We then measured the depletion of OTUs from the endospore-  
303 enrichment using 16S rDNA sequencing (Figure 4B). When correcting for biomass via  
304 qPCR, nearly 20% of OTUs identified in the resistant fraction apparently germinated in  
305 response to bile acids (log-link quasipoisson generalized linear model, p-value < 0.05,  
306 Supplementary Table 3). The true fraction of resistant cells that lose resistance in  
307 response to bile acids is likely higher, as many endospores require an activation step  
308 (i.e. heating at 80°C or treatment with lysozyme as for *C. difficile* (Sorg and Sonenshein,  
309 2010)) before they will respond to germinants.

310

311 Notably, most ethanol-resistant OTUs began to show a germination-like response at  
312 0.5% bile (Figure 4B), which is near the concentrations found in the human small  
313 intestine (Ceuppens *et al.*, 2012). Although Clostridia and other putative endospore-  
314 formers make up the majority of organisms that lose resistance in response to bile  
315 acids, genera in the Actinobacteria and other resistant cells also show this response  
316 when approaching physiological concentrations. These conserved responses suggest  
317 that the same cues can mediate loss of resistance in distantly related organisms, similar  
318 to the conserved resuscitation response of dormant bacteria to peptidoglycan (Shah *et*  
319 *al.*, 2008).

320

321 *rOTUs exhibit shared dynamics in diverse contexts*

322

323 Correlated behavior, increased prevalence, and shared signals for growth among  
324 rOTUs indicated that these organisms might exhibit a global response during  
325 disturbances of various kinds. To test this hypothesis, we made a sequence database of  
326 rOTUs within our cohort, and used this database to identify putative rOTUs in other  
327 datasets (Figure 5A). While certainly not all rOTUs in our dataset will map to organisms  
328 forming resistant states in other datasets, we assume that some strains or species  
329 within an rOTU are capable of forming a resistant state at some time.

330

331 We expected that increased prevalence and shared signals for growth would lead to  
332 enhanced colonization of the developing infant gut microbiota (Koenig *et al.*, 2011). The  
333 lysozyme-resistant members of the Actinobacteria and Bacillales dominate the infant

334 gut microbiota for most of the first 80 days of life and do not equilibrate until the infant  
335 starts a full adult diet (Figure 5B). Early colonization by these rOTUs connects a  
336 resistant state to development of the infant gut microbiome. Here, lysozyme resistance  
337 might be essential for semi-selective transmission of *Bifidobacterium*, as human breast  
338 milk is rich in lysozyme (Chandan *et al.*, 1964), potentially lysing non-resistant cells.  
339 Others have shown endospore-formers negatively associate with vertical transmission  
340 from mother to infant (Nayfach *et al.*, 2016), but other environmentally resistant states  
341 as in the Actinobacteria may be important for vertical transmission as well.

342

343 Depletion of endospore-forming clades is common during infection with *C. difficile*. We  
344 predicted a strong signal for rOTUs in individuals infected with *C. difficile*, due to its  
345 sporulation requirement for transmission (Deakin *et al.*, 2012). We find a significant  
346 depletion of rOTUs dependent on *C. difficile* infection status (Figure 5C), with a serial  
347 depletion of rOTUs from healthy to first time diagnosis to recurrent patients (Allegretti *et*  
348 *al.*, 2016). Because of this depletion in rOTUs, we expected that fecal microbiota  
349 transplant (FMT) might transfer relatively more rOTUs than other OTUs (Youngster *et*  
350 *al.*, 2014). Indeed, among OTUs shared with donors, 90% of rOTUs increase in  
351 abundance following FMT, compared to 77% for the rest of the community (Fisher exact  
352 test, p-value = 0.008) (Figure 5D).

353

354 We suspected that rOTUs are a particularly malleable component of the microbiota. To  
355 test this hypothesis, we measured the turnover of rOTUs in the time series of an  
356 otherwise healthy male individual who was infected by Salmonella (David *et al.*, 2014).



357 New rOTUs almost completely replaced old rOTUs following this perturbation. By  
358 contrast, fewer OTUs from the rest of the community were lost and gained. This result  
359 holds both when examining the number of OTUs replaced (Fisher exact test, p-value =  
360 6e-12) as well as the change in abundance of these OTUs (Figure 5E). We see again  
361 that rOTUs exhibit coherent responses to changes in the gut environment, most  
362 pronounced in systems with dramatic perturbations. Colonization of newly vacant niches  
363 favors rOTUs, likely transmitted in an endospore or other resistant state to germinate in  
364 an environment replete with nutrients (including untransformed bile acids). In the  
365 absence of a fully functioning microbiota, rOTUs appear to fill open niches more readily  
366 than nOTUs.

367

## 368 **CONCLUSION**

369

370 Gut bacteria in the resistant fraction were more shared across individuals and showed  
371 more correlated dynamics compared to non-resistant organisms. Resistant taxa show  
372 greater turnover following large-scale disturbance events, as in the case of *C. difficile*  
373 and *Salmonella* infection, which suggests that many of these organisms are sensitive to  
374 environmental fluctuations and respond to stress by entering into a dormant, seed-like  
375 state. Environmental sensitivity and high turnover rates of resistant taxa provide an  
376 opportunity to manipulate the composition of the human gut microbiota through targeted  
377 perturbations and replacements. Because of the therapeutic relevance of Clostridia  
378 endospores (Atarashi *et al.*, 2011, 2013; Kim *et al.*, 2017; Stefka *et al.*, 2014; Yano *et*  
379 *al.*, 2015), determining the exact conditions that permit their replacement may be of high

380 value for future microbiota-based therapeutics. Here, we found that the growth of many  
381 resistant organisms was associated with dietary fatty acids. If this result extends to  
382 more individuals, one can imagine a therapeutic strategy coupling dietary changes with  
383 introduced resistant cells to enable robust colonization and engraftment.

384 **MATERIALS AND METHODS**

385

386 *Contact for reagent and resource sharing*

387

388 Further information may be obtained from the Lead Contact Eric J. Alm (Email:

389 [ejalm@mit.edu](mailto:ejalm@mit.edu); address: Massachusetts Institute of Technology Cambridge, MA,

390 02139, USA)

391

392 *Experimental Model and Subject Details*

393

394 **Human Subjects**

395

396 Human subject enrollment and sample collection was approved by the Institutional

397 Review Board of the Massachusetts Institute of Technology (IRB Approval Number:

398 1510271631). Informed consent was obtained from all subjects. 12 male and 12 female

399 healthy human subjects (age range 21-65) with no history of antibiotic use in the last six

400 months were enrolled in the study. In total, 24 fecal samples were collected from these

401 individuals and an additional 24 fecal samples were collected from one male individual

402 (age 24) over 24 days for culturing and DNA isolation.

403

404 *Method Details*

405

406 **Fecal Sample Processing and Storage**

407

408 Fecal samples were collected and processed in a biosafety cabinet within 30 minutes of  
409 defecation. Samples (5 g) were suspended in 20 mL of 1% sodium hexametaphosphate  
410 solution (a flocculant) in order to bring biomass into solution as described previously  
411 (Wunderlin *et al.*, 2014). Fecal samples were bump vortexed with glass beads to  
412 homogenize, and centrifuged at 50 x g for 5 min at room temperature to sediment  
413 particulate matter and beads. Triplicate aliquots of 1 mL of the supernatant liquid were  
414 transferred into cryovials and stored at -80° C until processing. For the time series,  
415 samples were collected at approximately 24-hour intervals.

416

#### 417 **Resistant Fraction Enrichment from Fecal Samples**

418

419 We modified a previously published method (Wunderlin *et al.*, 2014) for endospore  
420 sequencing to increase throughput and decrease signal from contaminating, non-  
421 endospore forming organisms. Fecal samples previously frozen at -80° C were thawed  
422 at 4° C prior to use, and 500 µL was aliquoted for resistant fraction, while the remaining  
423 500 µL was saved for bulk community DNA extraction. Samples were centrifuged at 4°  
424 C and 10,000 x g for 5 minutes, washed and then resuspended in 1 mL Tris-EDTA pH  
425 7.6. Samples were heated at 65° C for 30 minutes with shaking at 100 rpm and then  
426 cooled on ice for 5 minutes. Lysozyme (10 mg/mL) was added to a final concentration of  
427 2 mg/mL and the samples were incubated at 37° C for 30 minutes with shaking at 100  
428 rpm. At 30 minutes, 50 uL Proteinase K (>600 mAU/ml) (Qiagen) was added and the  
429 samples incubated for an additional 30 minutes at 37° C. Next, 200 uL 6% SDS, 0.3 N

430 NaOH solution was added and the samples incubated for 1 hour at room temperature  
431 with shaking at 100 rpm. Samples were then centrifuged at 10,000 rpm for 30 minutes.  
432 At this step, a pellet containing resistant endospores should be visible or slightly visible  
433 in the sample, and the pellet is washed three times at 10,000 x g with 1 mL chilled  
434 sterile ddH<sub>2</sub>O. The pellet is then resuspended in 100 uL ddH<sub>2</sub>O, and treated with 2 uL  
435 DNase I (Ambion) to remove residual contaminating DNA with incubation at 37° C for  
436 30 min. The DNase is killed by addition of 10 µL Proteinase K (Qiagen) and incubation  
437 at 50° C for 15 minutes, followed by incubation at 70° C for 10 minutes to inactivate  
438 Proteinase K. At this step, microscopic examination of samples is used to confirm the  
439 presence of phase-bright (or phase-dark) spores. The sample is then ready for  
440 downstream extraction and sequencing.

441

#### 442 **Extraction of Nucleic Acids**

443

444 We extracted DNA from both the original sample suspended in sodium  
445 hexametaphosphate and the output of the resistant fraction. Both the original sample  
446 and the resistant fraction were extracted with MoBio PowerSoil Isolation Kit (MoBio  
447 Laboratories, Inc.) with three 10 minute bead-beating steps followed by sequential  
448 collection of 1/3 of the solution to enhance recovery of endospore DNA as shown  
449 previously (Bueche *et al.*, 2013). DNA was extracted from bacterial pure cultures, fecal  
450 enrichment cultures, and endospores using the same protocol as for fecal samples.  
451 DNA from bacterial colonies for 16S rDNA Sanger sequencing confirmation or qPCR

452 was obtained by homogenizing colonies in alkaline polyethylene glycol buffer as  
453 described previously (Chomczynski and Rymaszewski, 2006).

454

## 455 **16S rDNA Library Preparation and Sequencing**

456

457 Libraries for paired-end Illumina sequencing were constructed using a two-step 16S  
458 rRNA PCR amplicon approach as described previously with minor modifications  
459 (Preheim *et al.*, 2013). In order to account for cross-sample and buffer contamination,  
460 triplicate negative controls comprising resistant fraction extraction blanks, nucleic acid  
461 extraction blanks, and PCR negatives were included during library preparation and  
462 samples were randomized across the plate. The first-step primers (PE16S\_V4\_U515\_F,  
463 5' ACACG ACGCT CTTCC GATCT YRYRG TGCCA GCMGC CGCGG TAA-3';  
464 PE16S\_V4\_E786\_R, 5'-CGGCA TTCCT GCTGA ACCGC TCTTC CGATC TGGAC  
465 TACHV GGGTW TCTAA T 3') contain primers U515F and E786R targeting the V4  
466 region of the 16S rRNA gene, as described previously (Preheim *et al.*, 2013).  
467 Additionally, a complexity region in the forward primer (5'-YRYR-3') was added to help  
468 the image-processing software used to detect distinct clusters during Illumina next-  
469 generation sequencing. A second-step priming site is also present in both the forward  
470 (5'-ACACG ACGCT CTTCC GATCT-3') and reverse (5'-CGGCA TTCCT GCTGA  
471 ACCGC TCTTC CGATC T-3') first-step primers. The second-step primers incorporate  
472 the Illumina adapter sequences and a 9-bp barcode for library recognition (PE-III-PCR-  
473 F, 5'-AATGA TACGG CGACC ACCGA GATCT ACACT CTTTC CCTAC ACGAC  
474 GCTCT TCCGA TCT 3'; PE-III-PCR-001-096, 5'-CAAGC AGAAG ACGGC ATACG

475 AGATN NNNNN NNNCG GTCTC GGCAT TCCTG CTGAA CCGCT CTTCC GATCT 3',  
476 where N indicates the presence of a unique barcode.

477 Real-time qPCR before the first-step PCR was done to ensure uniform amplification and  
478 avoid overcycling all templates. Both real-time and first-step PCRs were done similarly  
479 to the manufacturer's protocol for Phusion polymerase (New England BioLabs, Ipswich,  
480 MA). For qPCR, reactions were assembled into 20  $\mu$ L reaction volumes containing the  
481 following: DNA-free H<sub>2</sub>O, 8.9  $\mu$ L, HF buffer, 4  $\mu$ L, dNTPs 0.4  $\mu$ L, PE16S\_V4\_U515\_F (3  
482  $\mu$ M), 2  $\mu$ L, PE16S\_V4\_E786\_R (3  $\mu$ M) 2  $\mu$ L, BSA (20 mg/mL), 0.5  $\mu$ L, EvaGreen (20X),  
483 1  $\mu$ L, Phusion, 0.2  $\mu$ L, and template DNA, 1  $\mu$ L. Reactions were cycled for 40 cycles  
484 with the following conditions: 98° C for 2 min (initial denaturation), 40 cycles of 98 C for  
485 30 s (denaturation), 52° C for 30 s (annealing), and 72° C for 30s (extension). Samples  
486 were diluted based on qPCR amplification to the level of the most dilute sample, and  
487 amplified to the maximum number of cycles needed for PCR amplification of the most  
488 dilute sample (18 cycles, maximally, with no more than 8 cycles of second step PCR).  
489 For first step PCR, reactions were scaled (EvaGreen dye excluded, water increased)  
490 and divided into three 25- $\mu$ l replicate reactions during both first- and second-step cycling  
491 reactions and cleaned after the first-and second-step using Agencourt AMPure XP-PCR  
492 purification (Beckman Coulter, Brea, CA) according to manufacturer instructions.  
493 Second-step PCR contained the following: DNA-free H<sub>2</sub>O, 10.65  $\mu$ L, HF buffer, 5  $\mu$ L,  
494 dNTPs 0.5  $\mu$ L, PE-III-PCR-F (3  $\mu$ M), 3.3  $\mu$ L, PE-III-PCR-XXX (3  $\mu$ M) 3.3  $\mu$ L, Phusion,  
495 0.25  $\mu$ L, and first-step PCR DNA, 2  $\mu$ L. Reactions were cycled for 10 cycles with the  
496 following conditions: 98° C for 30 s (initial denaturation), 10 cycles of 98° C for 30 s  
497 (denaturation), 83° C for 30 s (annealing), and 72° C for 30s (extension). Following

498 second-step clean-up, product quality was verified by DNA gel electrophoresis and  
499 sample DNA concentrations determined using Quant-iT PicoGreen dsDNA Assay Kit  
500 (Thermo Fisher Scientific). The libraries were multiplexed together and sequenced  
501 using the paired-end with 250-bp paired end reads approach on the MiSeq Illumina  
502 sequencing machine at the BioMicro Center (Massachusetts Institute of Technology,  
503 Cambridge, MA).

504

#### 505 **qPCR**

506 For testing of the resistant fraction protocol, qPCR was carried out as described in the  
507 **16S rDNA Library Preparation and Sequencing** section. Total bacterial abundance  
508 was quantified using the same primers. For quantification of Firmicutes and  
509 Actinobacteria, primer sequences were obtained from (Fierer *et al.*, 2005). Primers were  
510 used at the same concentrations as 16S primers, and annealing temperatures were  
511 adjusted to the appropriate temperature for the corresponding primer pairs.

512

#### 513 **16S rDNA Sequence Data Processing and Quality Control**

514 Paired-end reads were joined with PEAR (Zhang *et al.*, 2014) using default settings.  
515 After read joining, the complexity region between the adapters and the primer along with  
516 the primer sequence and adapters were removed. Except where specified otherwise,  
517 sequences were processed using the DADA2 (Callahan *et al.*, 2016) pipeline in R,  
518 trimming sequences to 240 bp long after quality filtering (quality trim Q10) with  
519 maximum expected errors set to 1. A sequence variant table was generated using



520 DADA2. Sequence variants were classified using RDP (Maidak *et al.*, 1996; Wang *et*  
521 *al.*, 2007). The resulting count tables were used as input for analysis within R.

522

### 523 **Identifying High Confidence Endospore-Forming & Resistant OTUs**

524

525 We developed a workflow for identifying organisms showing increased abundance in  
526 the resistant fraction relative to the bulk community. First sequences present at more  
527 than 1% in negative control samples were removed from the DADA2 sequence variant  
528 table. The resultant pruned sequence variant table was down-sampled to the minimum  
529 read depth (25808) and then used to calculate a resistance score for each sequence  
530 variant in each sample as Resistance Score = (# of reads in resistant fraction)/(# of  
531 reads in resistant fraction + # of reads in bulk community). We then identified sequence  
532 variants that had an resistance score greater than 0.5 (more reads in the resistant  
533 fraction than in the bulk) at least once across samples, denoting these sequence  
534 variants rOTUs. All other OTUs were considered nOTUs. Next, because there were  
535 several sequence variants found in the resistant fraction that were absent from all bulk  
536 communities (291 with 0 prevalence of 795 total rOTUs), we excluded calculations (as  
537 in Figure 4D) involving these OTUs, which would have apparently deflated prevalence  
538 estimate from the bulk community samples.

539

540 To compile a list of high-confidence resistant fraction-enriched organisms, we took a  
541 similar strategy as before, but also included OTUs which had 0 counts in the bulk  
542 community but non-zero counts in the resistant fraction. The OTUs increased in

543 abundance in the resistant fraction compared to the bulk community in more than half of  
544 the samples present (excluding singletons) were included in this list.

545

### 546 **Genomic Spore Gene Content**

547 Protein sequences in *Bacillus subtilis subtilis* 168 from genes identified as shared  
548 among all spore-forming Bacilli and Clostridia (Galperin *et al.*, 2012) were downloaded  
549 from UniProt (<http://www.uniprot.org/>) to make a spore gene database. All genomes as  
550 of August 2016 from 9 genera of the Clostridia in containing OTUs that were both  
551 significantly enriched at times in the resistant fraction and significantly unenriched were  
552 downloaded from NCBI. A standard tblastn approach was used to identify homologues  
553 in the downloaded genomes with the corresponding genes in the spore gene database.  
554 After identifying presence/absence of spore genes, genome spore gene profiles were  
555 hierarchically clustered using UPGMA on the binary distance (Jaccard) matrix.

556

### 557 **Metabolite profiling**

558 Metabolites were measured using liquid chromatography tandem mass spectrometry  
559 (LC-MS) method operated on a Nexera X2 U-HPLC (Shimadzu Scientific Instruments;  
560 Marlborough, MA) coupled to a Q Exactive hybrid quadrupole orbitrap mass  
561 spectrometer (Thermo Fisher Scientific; Waltham, MA) methods. Stool samples  
562 (200mg/mL in 1% sodium hexametaphosphate) were homogenized using a TissueLyser  
563 II (Qiagen). Stool homogenates (30  $\mu$ L) were extracted using 90  $\mu$ L of methanol  
564 containing PGE2-d4 as an internal standard (Cayman Chemical Co.; Ann Arbor, MI)  
565 and centrifuged (10 min, 10,000 x g, 4°C). The supernatants (2  $\mu$ L) were injected onto a

566 150 x 2.1 mm ACQUITY UPLC BEH C18 column (Waters; Milford, MA). The column  
567 was eluted isocratically at a flow rate: 450 $\mu$ L/min with 20% mobile phase A (0.1% formic  
568 acid in water) for 3 minutes followed by a linear gradient to 100% mobile phase B  
569 (acetonitrile with 0.1% formic acid) over 12 minutes. MS analyses were carried out  
570 using electrospray ionization in the negative ion mode using full scan analysis  
571 over  $m/z$  70-850 at 70,000 resolution and 3 Hz data acquisition rate. Additional MS  
572 settings were: ion spray voltage, -3.5 kV; capillary temperature, 320°C; probe heater  
573 temperature, 300 °C; sheath gas, 45; auxiliary gas, 10; and S-lens RF level 60. Raw  
574 data were processed using TraceFinder 3.3 (Thermo Fisher Scientific; Waltham, MA)  
575 and Progenesis QI (Nonlinear Dynamics; Newcastle upon Tyne, UK) software for  
576 detection and integration of LC-MS peaks.

577

### 578 **Bile germination tests**

579

580 Treatment of fecal samples with ethanol has previously been shown to allow culture-  
581 based recovery of endospore-forming organisms (Browne *et al.*, 2016). To this end,  
582 fresh fecal samples were homogenized in 50% ethanol (250 mg/mL), incubated for 1  
583 hour under aerobic conditions with shaking at 100 rpm, and washed three times (5 min,  
584 10,000 x g) with sterile water to remove residual ethanol. Serial dilutions from 1e-4-10%  
585 (w/v) bile bovine oxgall (Sigma) were prepared in sterile water and 2.5 mL ethanol-  
586 treated fecal suspension mixed in triplicate with 2.5 mL each of these bile solutions.  
587 Samples were incubated under aerobic conditions for 2 hours at 37° C with 200 rpm

588 shaking, and then transferred to  $-80^{\circ}$  C prior to resistant fraction extraction and 16S  
589 rDNA library preparation.

590

### 591 **Bile germination analysis**

592

593 We transformed 16S rDNA sequencing counts generated by the bile germination tests  
594 again using the cumulative sum-scaling transformation (Paulson *et al.*, 2013). Under the  
595 assumption that cells in the resistant fraction can only decrease or remain the same  
596 during treatment, we searched for negative relationships between bile acid  
597 concentration and abundance that would indicate an OTU had germinated. To identify  
598 significant negative relationships, we first fit a generalized linear model (GLM) with a  
599 log-link quasi-Poisson distribution to the normalized counts of OTUs present in the  
600 control sample with bile acid concentration as the predictor variable. We then identified  
601 the OTU with the strongest positive trend in the data (that with the highest positive slope  
602 and lowest p-value). We assume that OTUs increase due only to compositional effects  
603 (that is, this OTU has not germinated but its abundance apparently increases due to  
604 loss of other OTUs), and we use the slope estimated from the fit of this model to  
605 detrend the other dose-response data so as to constrain the abundance of this  
606 apparently increasing OTU to be constant. We do so by dividing counts of all OTUs by  
607  $\exp(\text{slope} \times \text{bile acid concentration})$ , which is also a measure of the depletion of the  
608 endospore-enrichment biomass. From this detrended dose-response data, we again fit  
609 a quasipoisson GLM and identify putatively germinating OTUs as those having a  
610 significant ( $p < 0.05$ ) negative slope.

611

## 612 **Analysis of Infant Gut Time Series**

613

614 SRA files containing 16S rDNA Sequences were downloaded from Genbank under  
615 accession no. [SRA012472](#)) (Koenig *et al.*, 2011). Sequences were generated using a  
616 Roche 454 pyrosequencer. In order to simplify analysis of the dataset, these sequences  
617 were again processed using the protocol outlined for processing of the original dataset  
618 in this paper. However, sequences were quality trimmed using Q20 to 230 base pairs,  
619 and the retained sequences were used to call 100% OTUs. OTUs were assigned  
620 taxonomies using RDP and 100% OTUs were collapsed into taxonomic names. As very  
621 few sequences matched between datasets when using uclust, these taxonomic names  
622 were instead used to identify organisms as potential resistant cell-formers based on the  
623 correspondence to the RDP-assigned taxonomic names of high confidence resistant  
624 cell-formers identified previously. While this approach loses information given the noted  
625 heterogeneity in resistance phenotypes even among closely related strains, the original  
626 sequences themselves are still proxies for having this phenotype, and so the results of  
627 such analysis must be interpreted keeping this observation in mind.

628

629 The relative abundance of organisms identified in the infant gut time series as putative  
630 resistant-cell formers were summed, and the dynamics of this resistant cell-forming  
631 population in the infant gut was visualized over time.

632

633 **Analysis of 16S rDNA sequence files from first time and recurrent *C. difficile***  
634 **infection**

635

636 The open reference 97% OTU table including RDP taxonomic annotations from  
637 Allegretti et al 2016 was used for this analysis (Allegretti *et al.*, 2016). OTU IDs were  
638 mapped using uclust to the corresponding genus level OTUs identified as rOTUs from  
639 this study. Patients were grouped either as healthy, first-time *C. difficile* infection (fCDI),  
640 or recurrent *C. difficile* infection (rCDI), and the fraction of rOTUs was calculated by  
641 summing their relative abundances within each patient. A Mann Whitney U test was  
642 used to determine whether there were significant differences in the total relative  
643 abundance of rOTUs across groups with a Bonferroni multiple hypothesis test  
644 correction.

645

646 **Analysis of 16S rDNA sequence files from fecal microbiota transplant in relapsing**  
647 ***C. difficile* infection**

648

649 This dataset was obtained from (Youngster *et al.*, 2014). To simplify analysis, an  
650 existing closed-reference GreenGenes 97% OTU table generated by the original  
651 authors was used. Closed-reference OTU IDs were mapped back to GreenGenes  
652 reference sequences, and sequences were assigned to the resistant cell-former  
653 database sequences again using uclust as for the adult time series.

654

655 Unique pre-FMT, post-FMT, and donor samples were separated in the dataset. We  
656 again identified organisms that had significantly different relative abundance (Benjamini-  
657 Hochberg adjusted Mann-Whitney U test  $p < 0.05$ ) across the groups for our analysis.  
658 We again obtained four categories of OTUs: nonresistant and resistant cell-formers that  
659 were elevated in the donor and the post-FMT samples relative to the pre-FMT samples.  
660 We used the Fisher exact test on the contingency table containing the number of OTUs  
661 in each of the previously mentioned categories to identify whether OTU engraftment  
662 from the donor was different across the groupings.

663

664 **Analysis of 16S rDNA sequence files in adult time series pre- and post-**  
665 **Salmonella Infection**

666

667 Illumina HiSeq sequencing files containing 16S rDNA sequences from the stool of a  
668 healthy adult male (David *et al.*, 2014) were downloaded and processed as described  
669 for the original dataset in this paper, except that sequences were trimmed to 101 base  
670 pairs as described previously before calling 100% OTUs due to the use of shorter read  
671 sequencing technology. Sequences were assigned to the resistant cell-former database  
672 sequences using uclust constrained with the parameters: --id 99 --usersort --libonly, in  
673 order that sequences from this dataset would be assigned only to resistant cell-formers.

674

675 In order to assess the presence of differential turnover between resistant and non-  
676 resistant cell formers in this dataset, we identified organisms that had significantly  
677 different relative abundance (Benjamini-Hochberg adjusted Mann-Whitney U test  $p <$

678 0.05) before Salmonella infection starting at day 151 (days 0-150) and after the end of  
679 infection at day 159 (days 160-252). We partitioned these OTUs into four sets for our  
680 analysis: non-resistant and resistant cell formers whose median abundance was higher  
681 post-infection and those whose median abundance was lower post-infection. We used  
682 the Fisher exact test on the contingency table containing the number of OTUs in each of  
683 the previously mentioned categories to identify whether the OTU turnover was different  
684 across the groupings.

685

#### 686 **DATA AVAILABILITY STATEMENT**

687 All amplicon sequencing data generated in this study have been can be accessed on  
688 the US National Center for Biotechnology Information SRA database under BioProject  
689 PRJNA389431. Metabolomic data and DADA2 sequence variant tables are available  
690 online through Github (<https://github.com/microbetrainer/Spores>).

691

#### 692 **CODE AVAILABILITY STATEMENT**

693 All custom scripts generated in R to analyze the data in this paper will be made  
694 available through GitHub (<https://github.com/microbetrainer/Spores>).

695

#### 696 **ACKNOWLEDGMENTS**

697 We thank Fatima Hussain and Mathieu Groussin for extensive discussion and  
698 experimental advice. We thank the MIT BioMicro Center for sequencing service.

699



700 Funding was provided by the Broad Institute BN10 Training Grants. SM Kearney was  
701 funded by an NSF Graduate Research Fellowship.

702

### 703 **CONFLICT OF INTEREST STATEMENT**

704 The authors declare no conflict of interest.

705

### 706 **SUPPLEMENTARY INFORMATION**

707 Supplementary information is available at ISME's website

708

### 709 **REFERENCES**

710

711 Alexander CJ, Citron DM, Brazier JS, Goldstein EJ. (1995). Identification and  
712 antimicrobial resistance patterns of clinical isolates of *Clostridium clostridioforme*,  
713 *Clostridium innocuum*, and *Clostridium ramosum* compared with those of clinical  
714 isolates of *Clostridium perfringens*. *J Clin Microbiol* **33**: 3209–3215.

715 Allegretti JR, Kearney S, Li N, Bogart E, Bullock K, Gerber GK, *et al.* (2016). Recurrent  
716 *Clostridium difficile* infection associates with distinct bile acid and microbiome profiles.  
717 *Aliment Pharmacol Ther* **43**: 1142–1153.

718 Angert ER, Losick RM. (1998). Propagation by sporulation in the guinea pig symbiont  
719 *Metabacterium polyspora*. *Proc Natl Acad Sci* **95**: 10218–10223.

- 720 Atarashi K, Tanoue T, Oshima K, Suda W, Nagano Y, Nishikawa H, *et al.* (2013). Treg  
721 induction by a rationally selected mixture of Clostridia strains from the human  
722 microbiota. *Nature* **500**: 232–236.
- 723 Atarashi K, Tanoue T, Shima T, Imaoka A, Kuwahara T, Momose Y, *et al.* (2011).  
724 Induction of Colonic Regulatory T Cells by Indigenous Clostridium Species. *Science*  
725 **331**: 337–341.
- 726 Browne HP, Forster SC, Anonye BO, Kumar N, Neville BA, Stares MD, *et al.* (2016).  
727 Culturing of ‘unculturable’ human microbiota reveals novel taxa and extensive  
728 sporulation. *Nature* **533**: 543–546.
- 729 Bueche M, Wunderlin T, Roussel-Delif L, Junier T, Sauvain L, Jeanneret N, *et al.*  
730 (2013). Quantification of Endospore-Forming Firmicutes by Quantitative PCR with the  
731 Functional Gene *spo0A*. *Appl Environ Microbiol* **79**: 5302–5312.
- 732 Callahan BJ, McMurdie PJ, Rosen MJ, Han AW, Johnson AJA, Holmes SP. (2016).  
733 DADA2: High-resolution sample inference from Illumina amplicon data. *Nat Methods* **13**:  
734 581.
- 735 Ceuppens S, Uyttendaele M, Drieskens K, Heyndrickx M, Rajkovic A, Boon N, *et al.*  
736 (2012). Survival and Germination of *Bacillus cereus* Spores without Outgrowth or  
737 Enterotoxin Production during In Vitro Simulation of Gastrointestinal Transit. *Appl*  
738 *Environ Microbiol* **78**: 7698–7705.
- 739 Chandan RC, Shahani KM, Holly RG. (1964). Lysozyme Content of Human Milk. *Nature*  
740 **204**: 76.

- 741 Chomczynski P, Rymaszewski M. (2006). Alkaline polyethylene glycol-based method  
742 for direct PCR from bacteria, eukaryotic tissue samples, and whole blood.  
743 *Biotechniques* **40**: 454.
- 744 David LA, Materna AC, Friedman J, Campos-Baptista MI, Blackburn MC, Perrotta A, *et*  
745 *al.* (2014). Host lifestyle affects human microbiota on daily timescales. *Genome Biol* **15**:  
746 R89.
- 747 Deakin LJ, Clare S, Fagan RP, Dawson LF, Pickard DJ, West MR, *et al.* (2012). The  
748 *Clostridium difficile spo0A* Gene Is a Persistence and Transmission Factor Bäumler AJ  
749 (ed). *Infect Immun* **80**: 2704–2711.
- 750 Devkota S, Wang Y, Musch MW, Leone V, Fehlner-Peach H, Nadimpalli A, *et al.*  
751 (2012). Dietary-fat-induced taurocholic acid promotes pathobiont expansion and colitis  
752 in *Il10<sup>-/-</sup>* mice. *Nature*. e-pub ahead of print, doi: 10.1038/nature11225.
- 753 Dingman DW, Stahly DP. (1983). Medium promoting sporulation of *Bacillus* larvae and  
754 metabolism of medium components. *Appl Environ Microbiol* **46**: 860–869.
- 755 Edgar RC. (2010). Search and clustering orders of magnitude faster than BLAST.  
756 *Bioinformatics* **26**: 2460–2461.
- 757 Eeckhaut V, Van Immerseel F, Croubels S, De Baere S, Haesebrouck F, Ducatelle R, *et*  
758 *al.* (2011). Butyrate production in phylogenetically diverse Firmicutes isolated from the  
759 chicken caecum: Butyrate-producing bacteria from the chicken caecum. *Microb*  
760 *Biotechnol* **4**: 503–512.

- 761 Fahlgrén A, Hammarström S, Danielsson Å, HAMMARSTRÖM M-L. (2003). Increased  
762 expression of antimicrobial peptides and lysozyme in colonic epithelial cells of patients  
763 with ulcerative colitis. *Clin Exp Immunol* **131**: 90–101.
- 764 Fierer N, Jackson JA, Vilgalys R, Jackson RB. (2005). Assessment of soil microbial  
765 community structure by use of taxon-specific quantitative PCR assays. *Appl Environ*  
766 *Microbiol* **71**: 4117–4120.
- 767 Filippidou S, Junier T, Wunderlin T, Lo C-C, Li P-E, Chain PS, *et al.* (2015). Under-  
768 detection of endospore-forming Firmicutes in metagenomic data. *Comput Struct*  
769 *Biotechnol J* **13**: 299–306.
- 770 Flint JF, Drzymalski D, Montgomery WL, Southam G, Angert ER. (2005). Nocturnal  
771 Production of Endospores in Natural Populations of Epulopiscium-Like Surgeonfish  
772 Symbionts. *J Bacteriol* **187**: 7460–7470.
- 773 Francis MB, Allen CA, Shrestha R, Sorg JA. (2013). Bile Acid Recognition by the  
774 Clostridium difficile Germinant Receptor, CspC, Is Important for Establishing Infection  
775 Wessels MR (ed). *PLoS Pathog* **9**: e1003356.
- 776 Furusawa Y, Obata Y, Fukuda S, Endo TA, Nakato G, Takahashi D, *et al.* (2013).  
777 Commensal microbe-derived butyrate induces the differentiation of colonic regulatory T  
778 cells. *Nature* **504**: 446–450.
- 779 Galperin MY, Mekhedov SL, Puigbo P, Smirnov S, Wolf YI, Rigden DJ. (2012).  
780 Genomic determinants of sporulation in *Bacilli* and *Clostridia*: towards the minimal set

- 781 of sporulation-specific genes: Distribution of sporulation genes in *Bacilli* and *Clostridia*.  
782 *Environ Microbiol* **14**: 2870–2890.
- 783 Gueimonde M, Laitinen K, Salminen S, Isolauri E. (2007). Breast milk: a source of  
784 bifidobacteria for infant gut development and maturation? *Neonatology* **92**: 64–66.
- 785 Ivanov II, Atarashi K, Manel N, Brodie EL, Shima T, Karaoz U, *et al.* (2009). Induction of  
786 Intestinal Th17 Cells by Segmented Filamentous Bacteria. *Cell* **139**: 485–498.
- 787 Kaplan I, Williams JW. (1941). Spore Formation among the Anaerobic Bacteria: I. The  
788 Formation of Spores by *Clostridium sporogenes* in Nutrient Agar Media. *J Bacteriol* **42**:  
789 265.
- 790 Keshav S, Chung P, Milon G, Gordon S. (1991). Lysozyme is an inducible marker of  
791 macrophage activation in murine tissues as demonstrated by in situ hybridization. *J Exp*  
792 *Med* **174**: 1049.
- 793 Kim Y-G, Sakamoto K, Seo S-U, Pickard JM, Gilliland MG, Pudlo NA, *et al.* (2017).  
794 Neonatal acquisition of *Clostridia* species protects against colonization by  
795 bacterial pathogens. *Science* **356**: 315.
- 796 Koenig JE, Spor A, Scalfone N, Fricker AD, Stombaugh J, Knight R, *et al.* (2011).  
797 Succession of microbial consortia in the developing infant gut microbiome. *Proc Natl*  
798 *Acad Sci* **108**: 4578–4585.
- 799 Kuwahara T, Ogura Y, Oshima K, Kurokawa K, Ooka T, Hirakawa H, *et al.* (2011). The  
800 Lifestyle of the Segmented Filamentous Bacterium: A Non-Culturable Gut-Associated

- 801 Immunostimulating Microbe Inferred by Whole-Genome Sequencing. *DNA Res* **18**:  
802 291–303.
- 803 Ley RE, Hamady M, Lozupone C, Turnbaugh PJ, Ramey RR, Bircher JS, *et al.* (2008).  
804 Evolution of Mammals and Their Gut Microbes. *Science* **320**: 1647–1651.
- 805 Li L, Mendis N, Trigui H, Oliver JD, Faucher SP. (2014). The importance of the viable  
806 but non-culturable state in human bacterial pathogens. *Front Microbiol* **5**: 258.
- 807 Louis P, Young P, Holtrop G, Flint HJ. (2010). Diversity of human colonic butyrate-  
808 producing bacteria revealed by analysis of the butyryl-CoA:acetate CoA-transferase  
809 gene. *Environ Microbiol* **12**: 304–314.
- 810 Maidak BL, Olsen GJ, Larsen N, Overbeek R, McCaughey MJ, Woese CR. (1996). The  
811 ribosomal database project (RDP). *Nucleic Acids Res* **24**: 82–85.
- 812 Makarova KS, Wolf YI, Koonin EV. (2009). Comprehensive comparative-genomic  
813 analysis of Type 2 toxin-antitoxin systems and related mobile stress response systems  
814 in prokaryotes. *Biol Direct* **4**: 19.
- 815 Maurice CF, Haiser HJ, Turnbaugh PJ. (2013). Xenobiotics Shape the Physiology and  
816 Gene Expression of the Active Human Gut Microbiome. *Cell* **152**: 39–50.
- 817 Nayfach S, Rodriguez-Mueller B, Garud N, Pollard KS. (2016). An integrated  
818 metagenomics pipeline for strain profiling reveals novel patterns of bacterial  
819 transmission and biogeography. *Genome Res* **26**: 1612–1625.

- 820 Paredes-Sabja D, Torres JA, Setlow P, Sarker MR. (2008). *Clostridium perfringens*  
821 Spore Germination: Characterization of Germinants and Their Receptors. *J Bacteriol*  
822 **190**: 1190–1201.
- 823 Paulson JN, Stine OC, Bravo HC, Pop M. (2013). Differential abundance analysis for  
824 microbial marker-gene surveys. *Nat Methods* **10**: 1200–1202.
- 825 Png CW, Lindén SK, Gilshenan KS, Zoetendal EG, McSweeney CS, Sly LI, *et al.*  
826 (2010). Mucolytic bacteria with increased prevalence in IBD mucosa augment in vitro  
827 utilization of mucin by other bacteria. *Am J Gastroenterol* **105**: 2420–2428.
- 828 Preheim SP, Perrotta AR, Martin-Platero AM, Gupta A, Alm EJ. (2013). Distribution-  
829 Based Clustering: Using Ecology To Refine the Operational Taxonomic Unit. *Appl*  
830 *Environ Microbiol* **79**: 6593–6603.
- 831 Sczesnak A, Segata N, Qin X, Gevers D, Petrosino JF, Huttenhower C, *et al.* (2011).  
832 The Genome of Th17 Cell-Inducing Segmented Filamentous Bacteria Reveals  
833 Extensive Auxotrophy and Adaptations to the Intestinal Environment. *Cell Host Microbe*  
834 **10**: 260–272.
- 835 Sekar R, Pernthaler A, Pernthaler J, Warnecke F, Posch T, Amann R. (2003). An  
836 Improved Protocol for Quantification of Freshwater Actinobacteria by Fluorescence In  
837 Situ Hybridization. *Appl Environ Microbiol* **69**: 2928–2935.
- 838 Serra CR, Earl AM, Barbosa TM, Kolter R, Henriques AO. (2014). Sporulation during  
839 Growth in a Gut Isolate of *Bacillus subtilis*. *J Bacteriol* **196**: 4184–4196.

- 840 Shah IM, Laaberki M-H, Popham DL, Dworkin J. (2008). A eukaryotic-like Ser/Thr  
841 kinase signals bacteria to exit dormancy in response to peptidoglycan fragments. *Cell*  
842 **135**: 486–496.
- 843 Smith PM, Howitt MR, Panikov N, Michaud M, Gallini CA, Bohlooly-Y M, *et al.* (2013).  
844 The Microbial Metabolites, Short-Chain Fatty Acids, Regulate Colonic Treg Cell  
845 Homeostasis. *Science* **341**: 569–573.
- 846 Sokol H, Pigneur B, Watterlot L, Lakhdari O, Bermúdez-Humarán LG, Gratadoux J-J, *et*  
847 *al.* (2008). Faecalibacterium prausnitzii is an anti-inflammatory commensal bacterium  
848 identified by gut microbiota analysis of Crohn disease patients. *Proc Natl Acad Sci* **105**:  
849 16731–16736.
- 850 Sorg JA, Sonenshein AL. (2010). Inhibiting the Initiation of Clostridium difficile Spore  
851 Germination using Analogs of Chenodeoxycholic Acid, a Bile Acid. *J Bacteriol* **192**:  
852 4983–4990.
- 853 Stefka AT, Feehley T, Tripathi P, Qiu J, McCoy K, Mazmanian SK, *et al.* (2014).  
854 Commensal bacteria protect against food allergen sensitization. *Proc Natl Acad Sci* **111**:  
855 13145–13150.
- 856 Van den Abbeele P, Belzer C, Goossens M, Kleerebezem M, De Vos WM, Thas O, *et*  
857 *al.* (2013). Butyrate-producing Clostridium cluster XIVa species specifically colonize  
858 mucins in an in vitro gut model. *ISME J* **7**: 949–961.



859 Wang Q, Garrity GM, Tiedje JM, Cole JR. (2007). Naive Bayesian classifier for rapid  
860 assignment of rRNA sequences into the new bacterial taxonomy. *Appl Environ Microbiol*  
861 **73**: 5261–5267.

862 Wunderlin T, Junier T, Roussel-Delif L, Jeanneret N, Junier P. (2014). Endospore-  
863 enriched sequencing approach reveals unprecedented diversity of *Firmicutes* in  
864 sediments: Endospore-forming enrichment. *Environ Microbiol Rep* **6**: 631–639.

865 Yano JM, Yu K, Donaldson GP, Shastri GG, Ann P, Ma L, *et al.* (2015). Indigenous  
866 Bacteria from the Gut Microbiota Regulate Host Serotonin Biosynthesis. *Cell* **161**: 264–  
867 276.

868 Youngster I, Sauk J, Pindar C, Wilson RG, Kaplan JL, Smith MB, *et al.* (2014). Fecal  
869 Microbiota Transplant for Relapsing *Clostridium difficile* Infection Using a Frozen  
870 Inoculum From Unrelated Donors: A Randomized, Open-Label, Controlled Pilot Study.  
871 *Clin Infect Dis* **58**: 1515–1522.

872 Zhang J, Kobert K, Flouri T, Stamatakis A. (2014). PEAR: a fast and accurate Illumina  
873 Paired-End reAd mergeR. *Bioinformatics* **30**: 614–620.

## 874 **FIGURE CAPTIONS**

875

876 **Figure 1. Resistant fraction sequencing of human fecal bacteria.** (A) Overview of  
877 resistant cell enrichment and 16S rDNA sequencing protocol. Resistant fraction  
878 samples are treated with a series of physical, enzymatic, and chemical lysis steps to  
879 deplete vegetative cells. DNA from bulk community and resistant fraction samples are

880 extracted via a mechanical lysis protocol, and 16S rDNA libraries prepared.  
881 Communities are analyzed to determine the change in abundance of each OTU in the  
882 resistant fraction relative to the bulk community. (right) Phase contrast images of bulk  
883 community and resistant fraction – phase bright cells are endospores. Endospores stain  
884 green when heat fixed with malachite green, vegetative cells appear red from safranin  
885 counter stain. (B) Representative results of 16S rDNA profile for bulk community and  
886 endospore-enriched samples. Reads from each OTU are summed across 24 individuals  
887 to give a meta-bulk and meta-endospore community. Phylogenetic classes in black text  
888 increase with resistant fraction; gray text classes decrease with resistant fraction. (C)  
889 Distribution of resistant fraction proportion across phyla aggregated across individuals  
890 filtered to remove OTUs with single counts in a sample (for visualization purposes).  
891 Colors represent phyla. OTUs with a resistant fraction proportion of 0 are absent from  
892 the resistant fraction; OTUs with a resistant fraction proportion of 1 are absent from the  
893 bulk community and only found in the resistant fraction.

894

895 **Figure 2. Resistant fraction OTUs are more shared across individuals than bulk**  
896 **community OTUs.** (A) Alpha diversity metrics measured for the bulk community (x-  
897 axis) and resistant fraction enrichments (y-axis). P-values are for the test of differences  
898 between alpha-diversity metric distributions using paired Wilcoxon Rank Sum Test. (B)  
899 Distribution of Jaccard distance between resistant fraction and bulk communities, within  
900 the resistant fraction, and within the bulk communities. (C) Multidimensional scaling on  
901 the Jensen-Shannon Divergence of all resistant fraction and bulk community samples.  
902 Black dots represent resistant fraction communities, gray dots represent bulk

903 community samples. (D) Comparison of the number of rOTU sequence variants in only  
904 one person and in multiple people to nOTU sequence variants in only one person and in  
905 multiple people.

906

907 **Figure 3. Taxa show heterogeneous patterns of resistant cell fractions across**  
908 **individuals.** Phylogenetic placement of the fraction of resistant organisms for taxa  
909 present within at least 8 individuals estimated by the ratio of counts scaled by qPCR-  
910 estimates of biomass in the resistant fractions and bulk communities. Tree branch  
911 colors represent the degree to which a taxonomic group was enriched in the resistant  
912 fraction with pink branches never enriched and blue and green branches enriched at  
913 least once. Classes within each phylum are shown with a colored bar. Arrows indicate  
914 OTUs showing the maximum (black) and minimum (gray) within-OTU variability in  
915 enrichment scores.

916

917 **Figure 4. Common signals govern resistant state exit and growth in the GI tract.**  
918 (A) Boxplot of the distribution of correlation distances (pairwise Euclidean distance  
919 between the Spearman correlation vectors for two OTUs) between rOTUs and nOTUs,  
920 within rOTUs, and within nOTUs. (B) Abundance of OTUs in the resistant fraction as a  
921 function of bile acid exposure for nine phylogenetically distant OTUs.

922

923 **Figure 5. Resistant OTUs show disproportionate turnover in diverse contexts.** (A)  
924 Overview of approach for identifying resistant-cell forming OTUs in 16S rDNA  
925 sequencing datasets. rOTU database sequences are matched to sequences in other

926 datasets, and then patterns within those datasets among the identified rOTUs are  
927 determined. (B) Fraction of rOTUs present during microbial colonization of an infant gut  
928 annotated with major diet and health perturbations. rOTUs encompass both putative  
929 endospore-forming organisms and those not known to form endospores, but which  
930 possess a resistant state (Actinobacteria and non-endospore-forming Firmicutes) (C)  
931 Fraction of rOTUs present as a function of *C. difficile* infection status (fCDI = first time *C.*  
932 *difficile* diagnosis, rCDI = at least 3 episodes of *C. difficile* infection following initial  
933 treatment) (D) Fraction of rOTUs and all other OTUs (non-resistant OTUs) transferred  
934 from donors to recipients by fecal microbiota transplant. (E) Time series of rOTUs (top)  
935 and all other (non-resistant) OTUs (bottom) from a human male infected with  
936 *Salmonella*, with OTUs significantly more abundant pre-infection (dark gray) and  
937 significantly more abundant post-infection (light gray).

938

939

940

**A**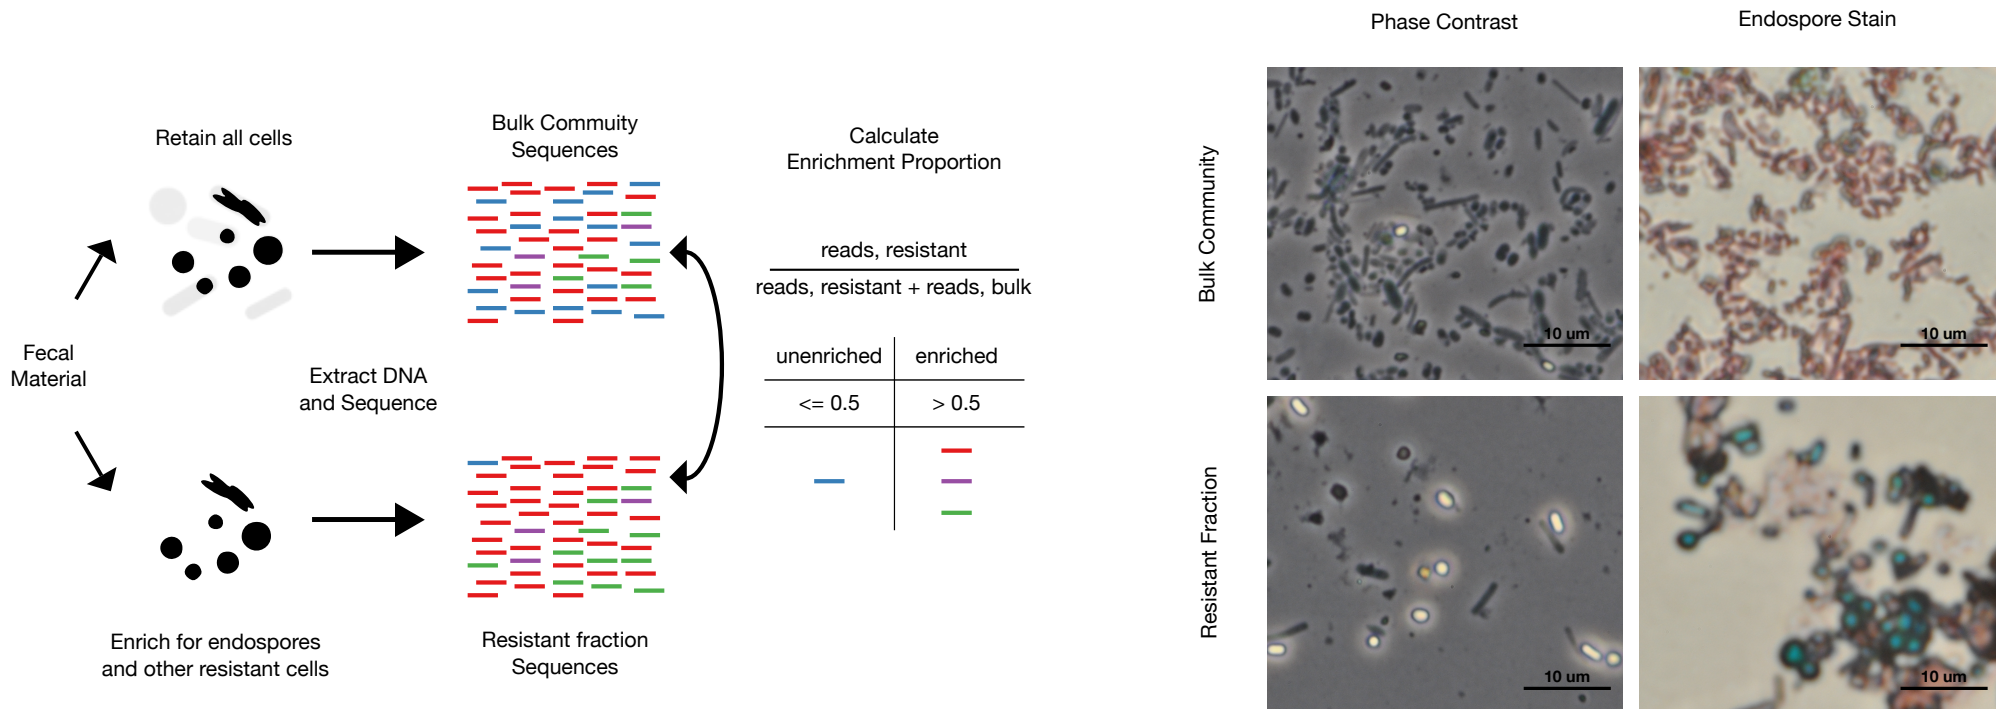**B**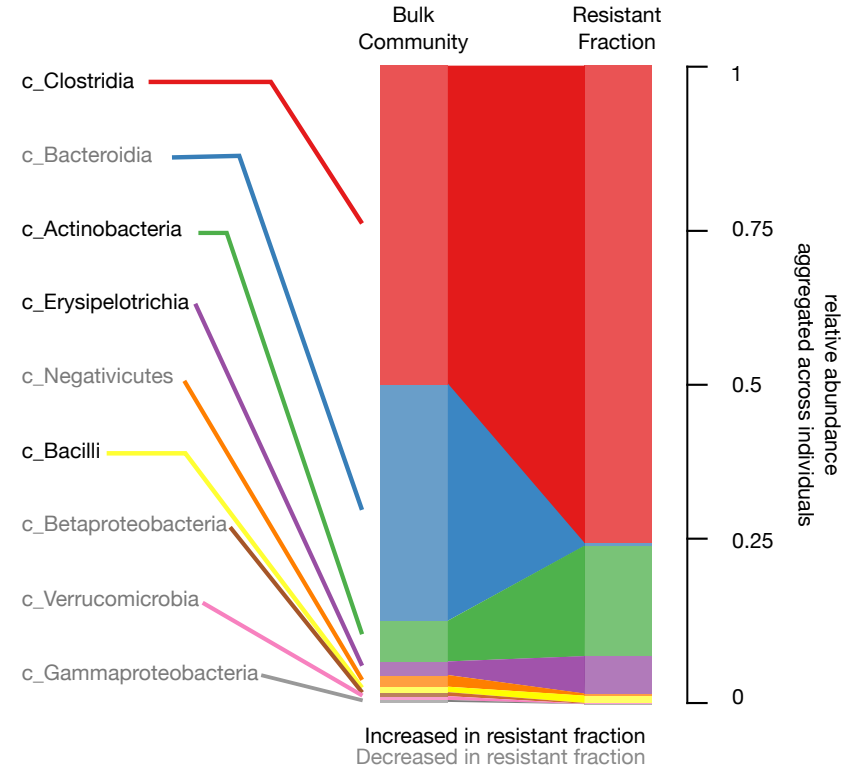**C**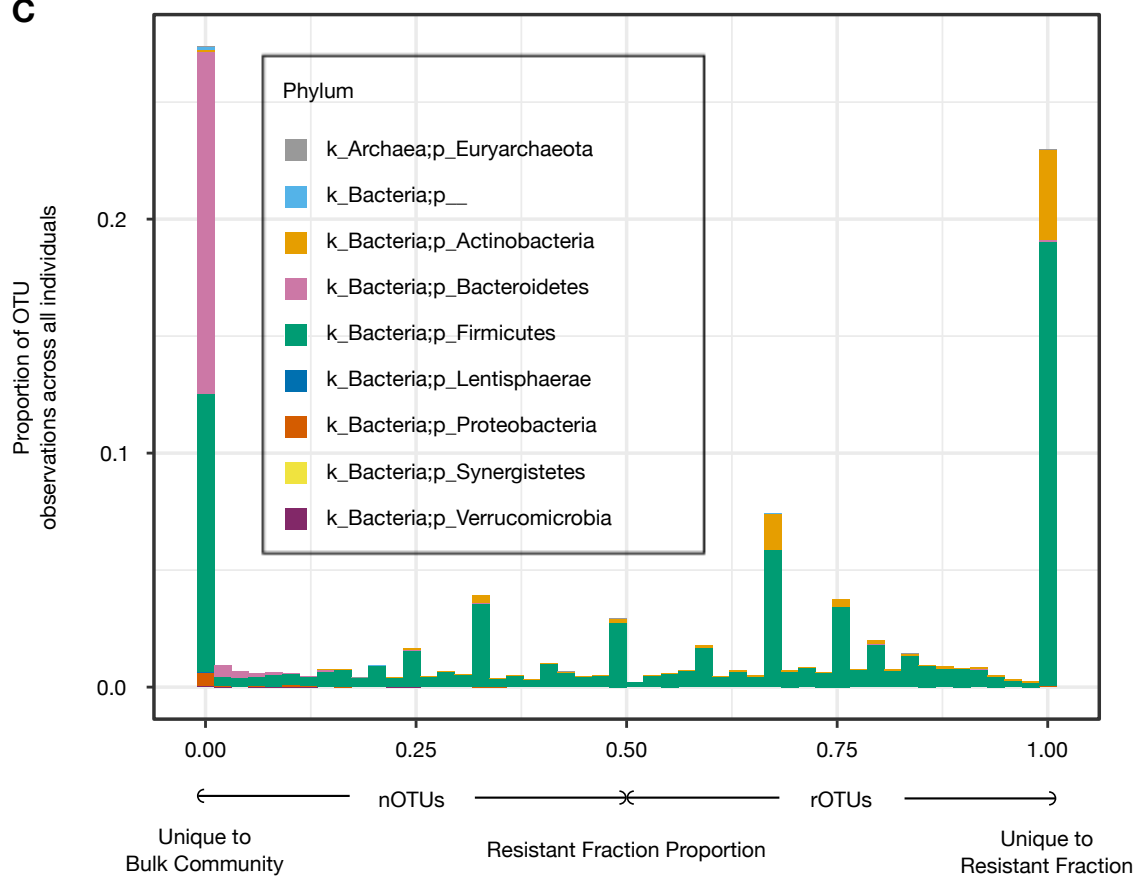

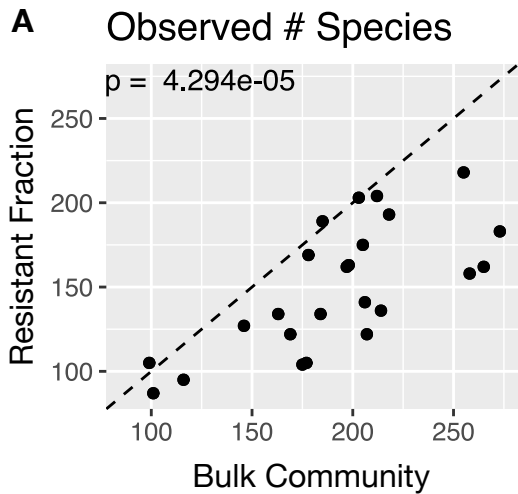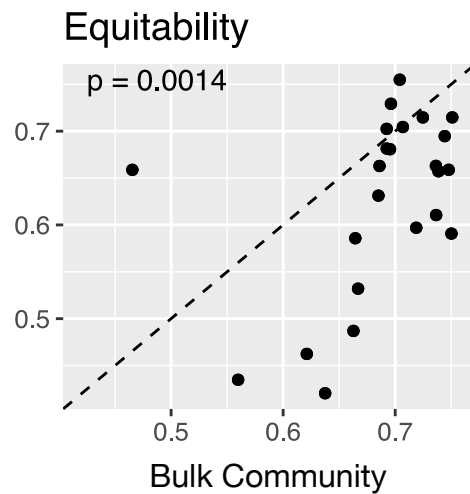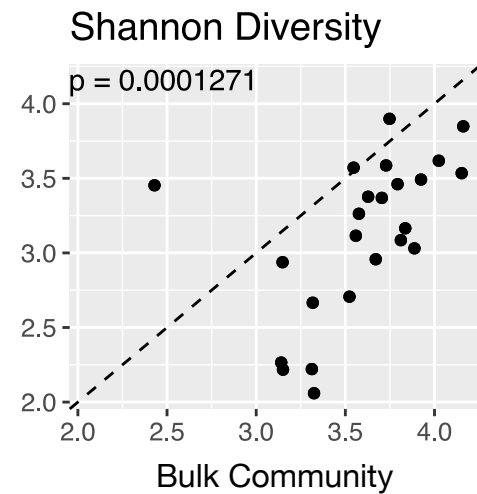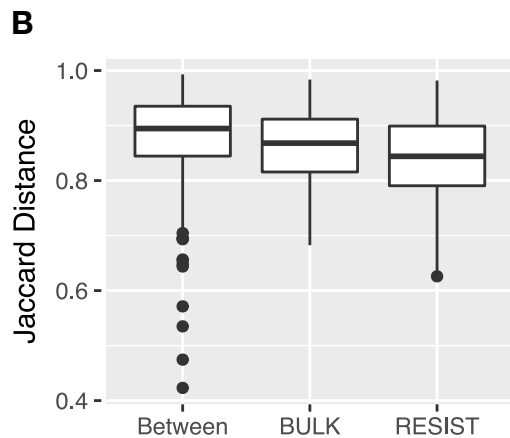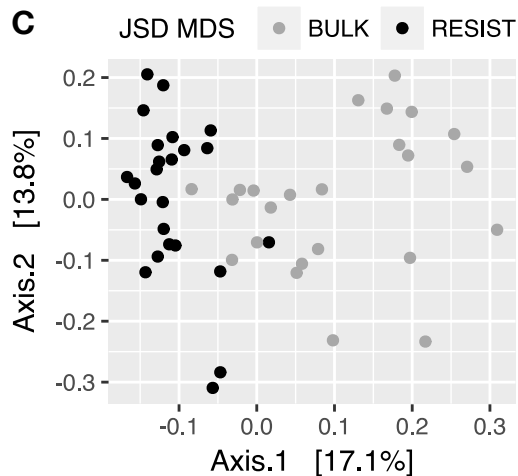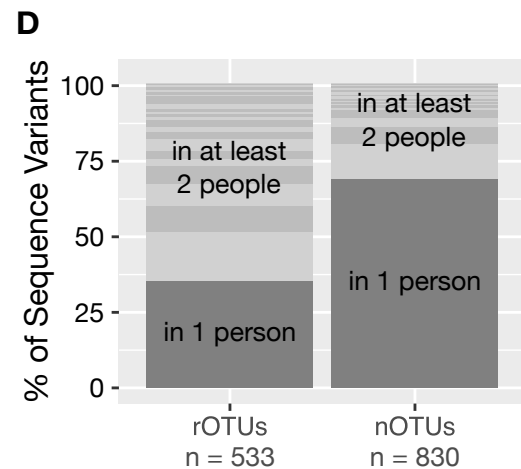

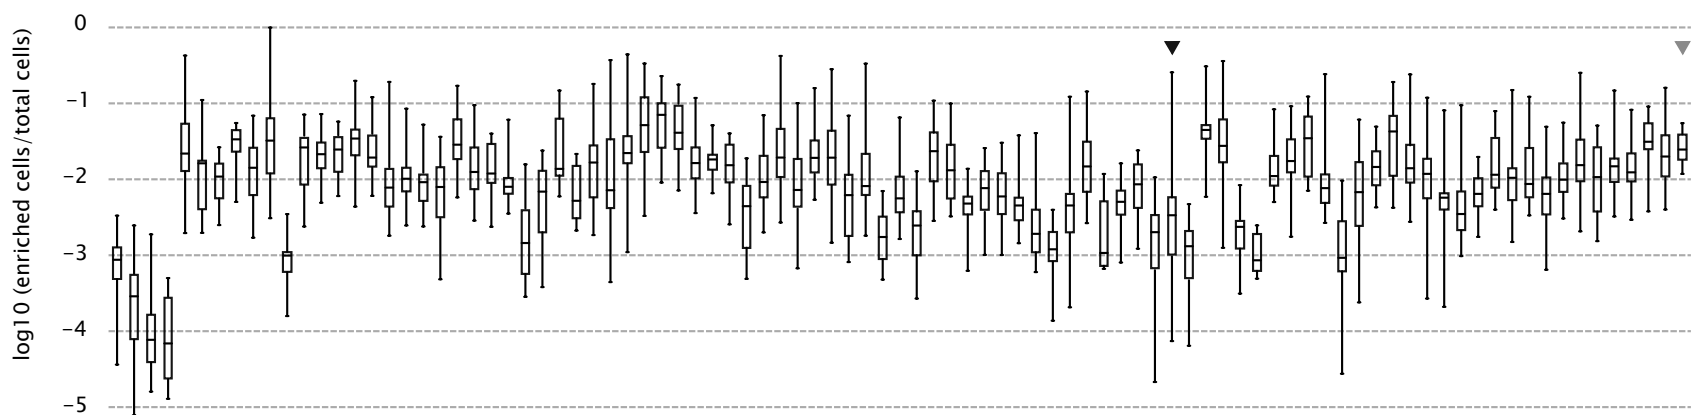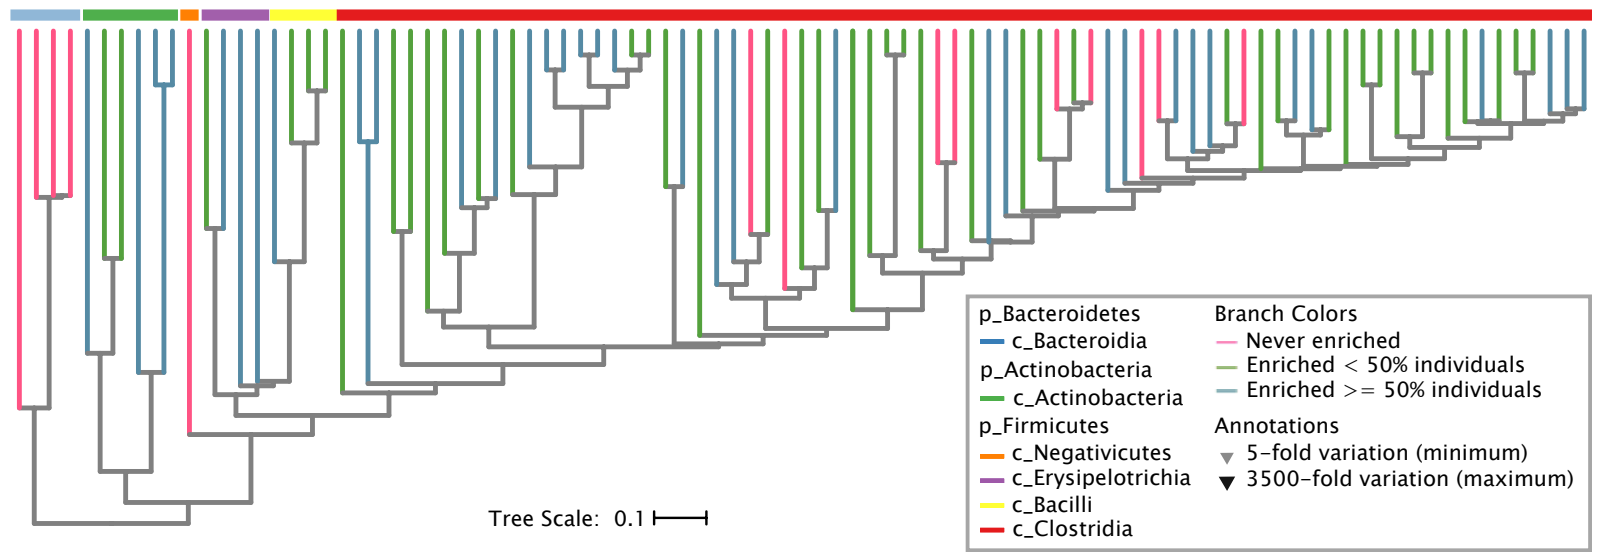

A

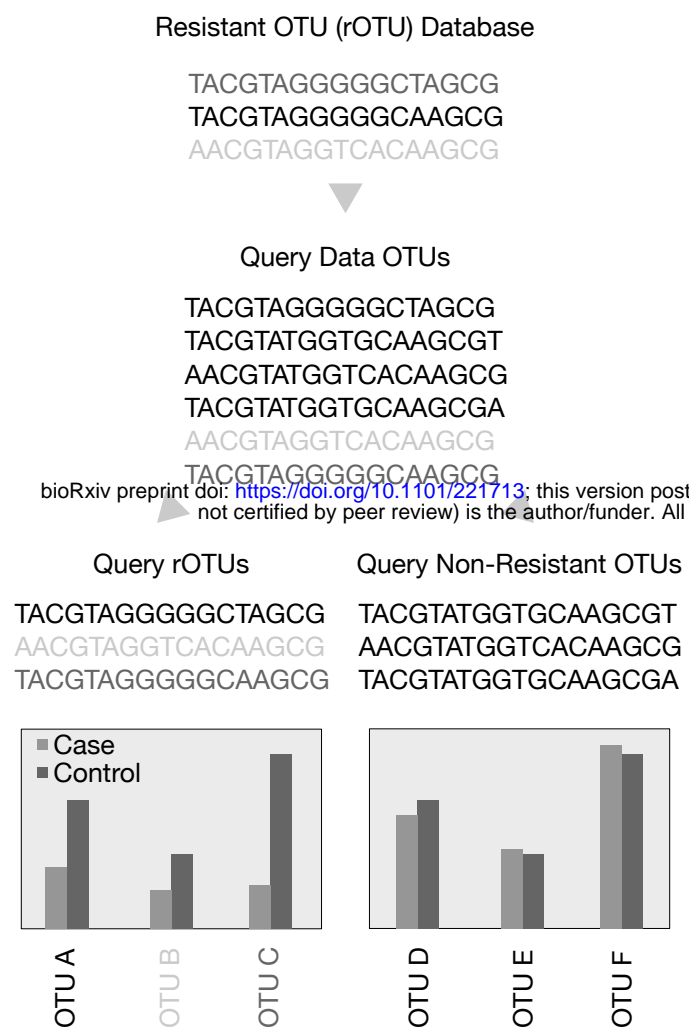

B

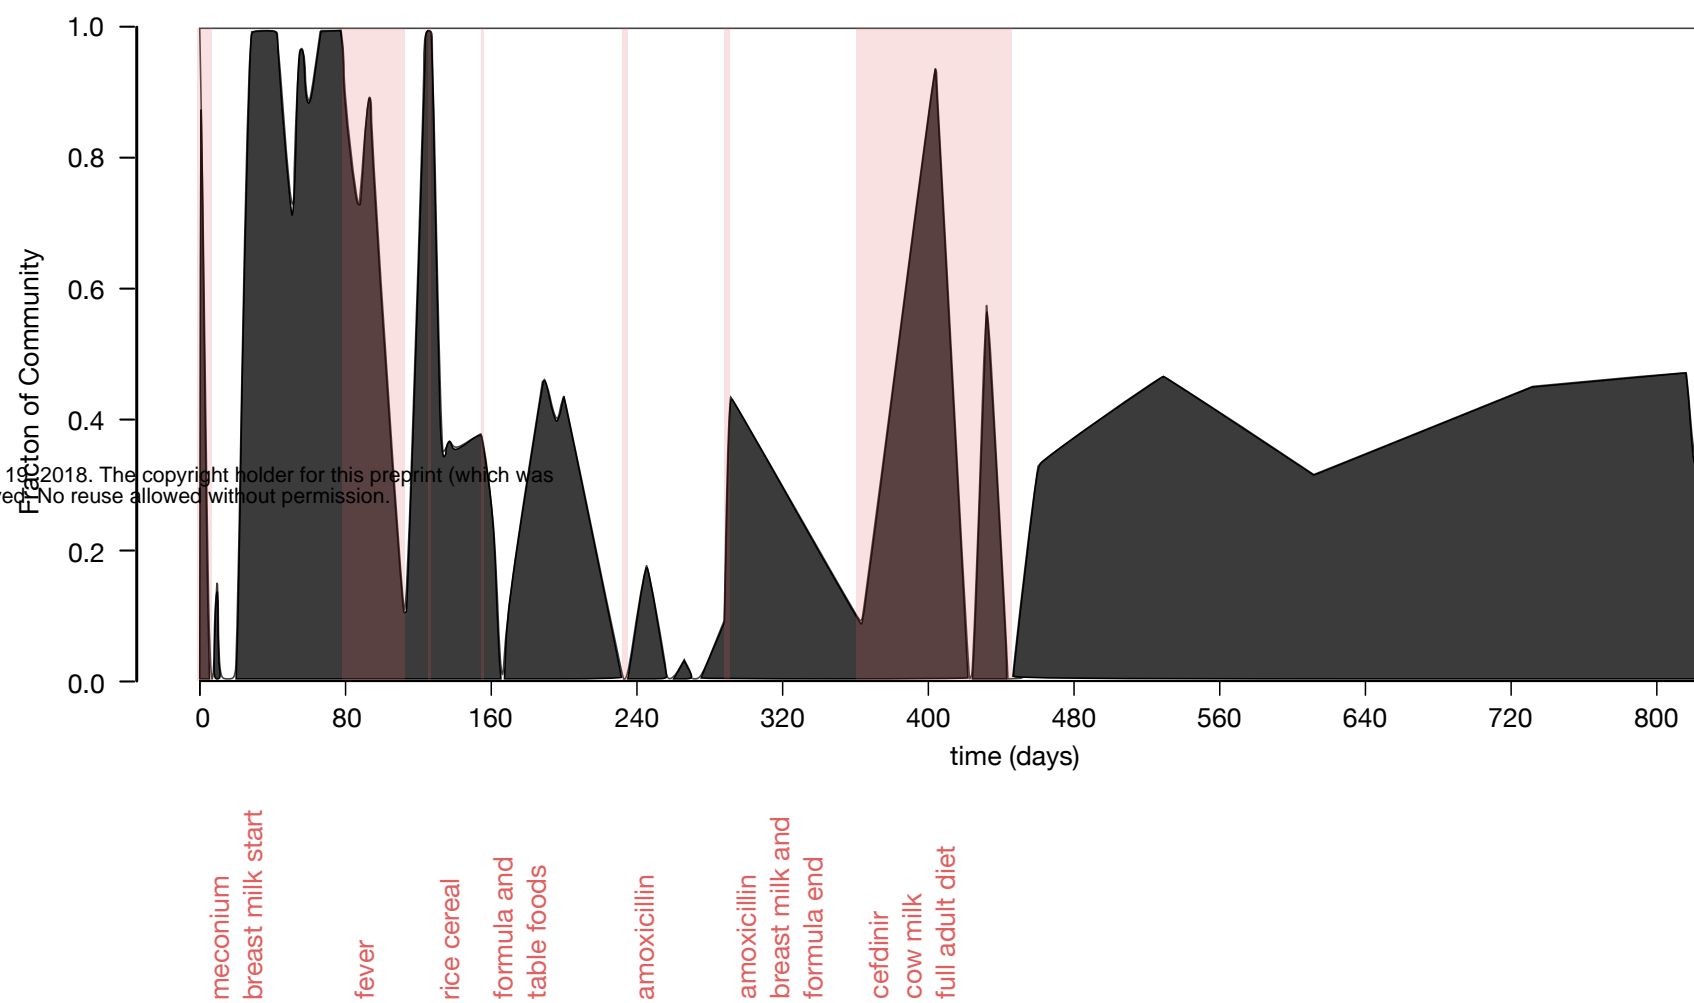

C

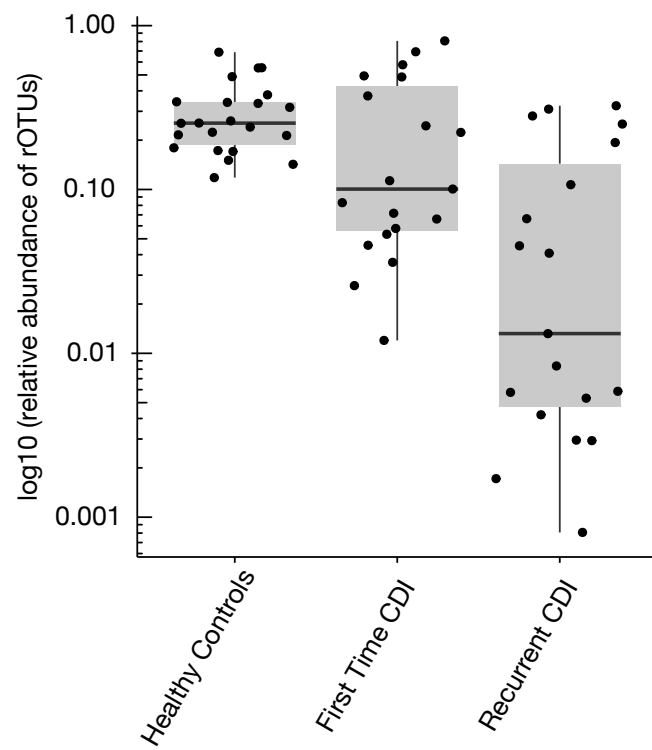

D

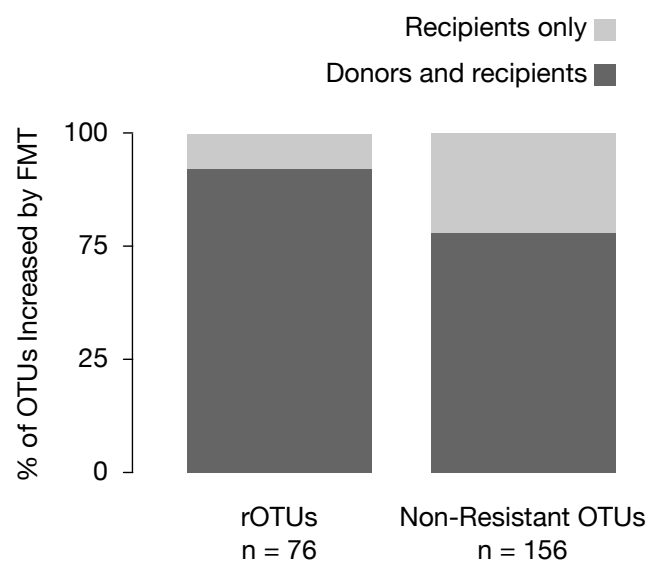

E

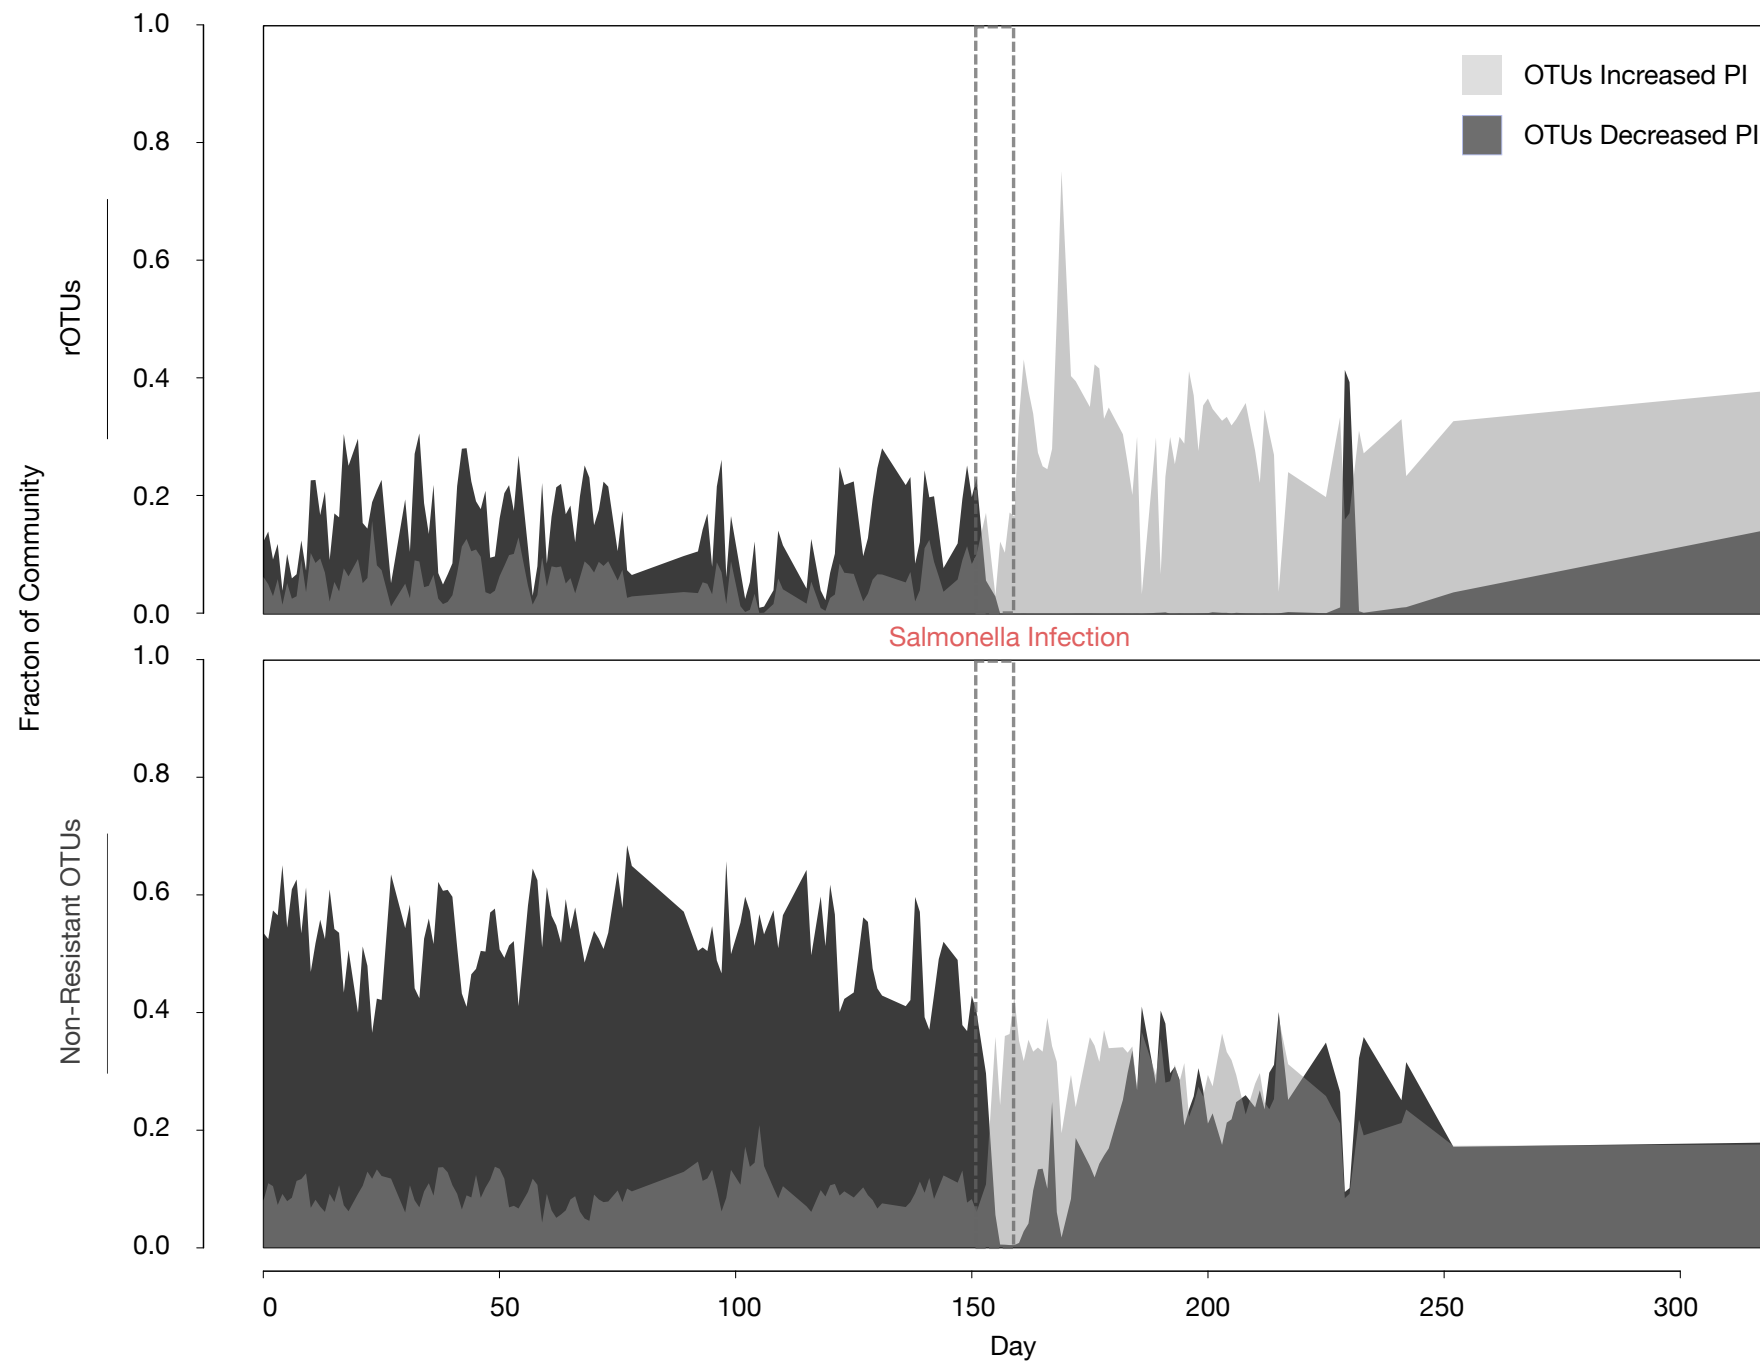



A

Resistant cell count per g wet weight feces

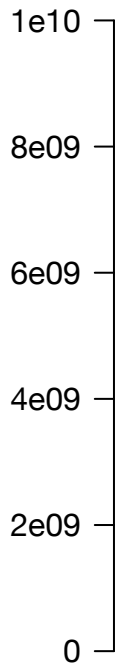

B

Fraction of resistant cells out of total cells

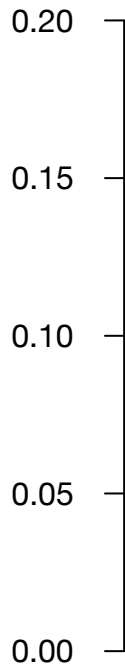

A

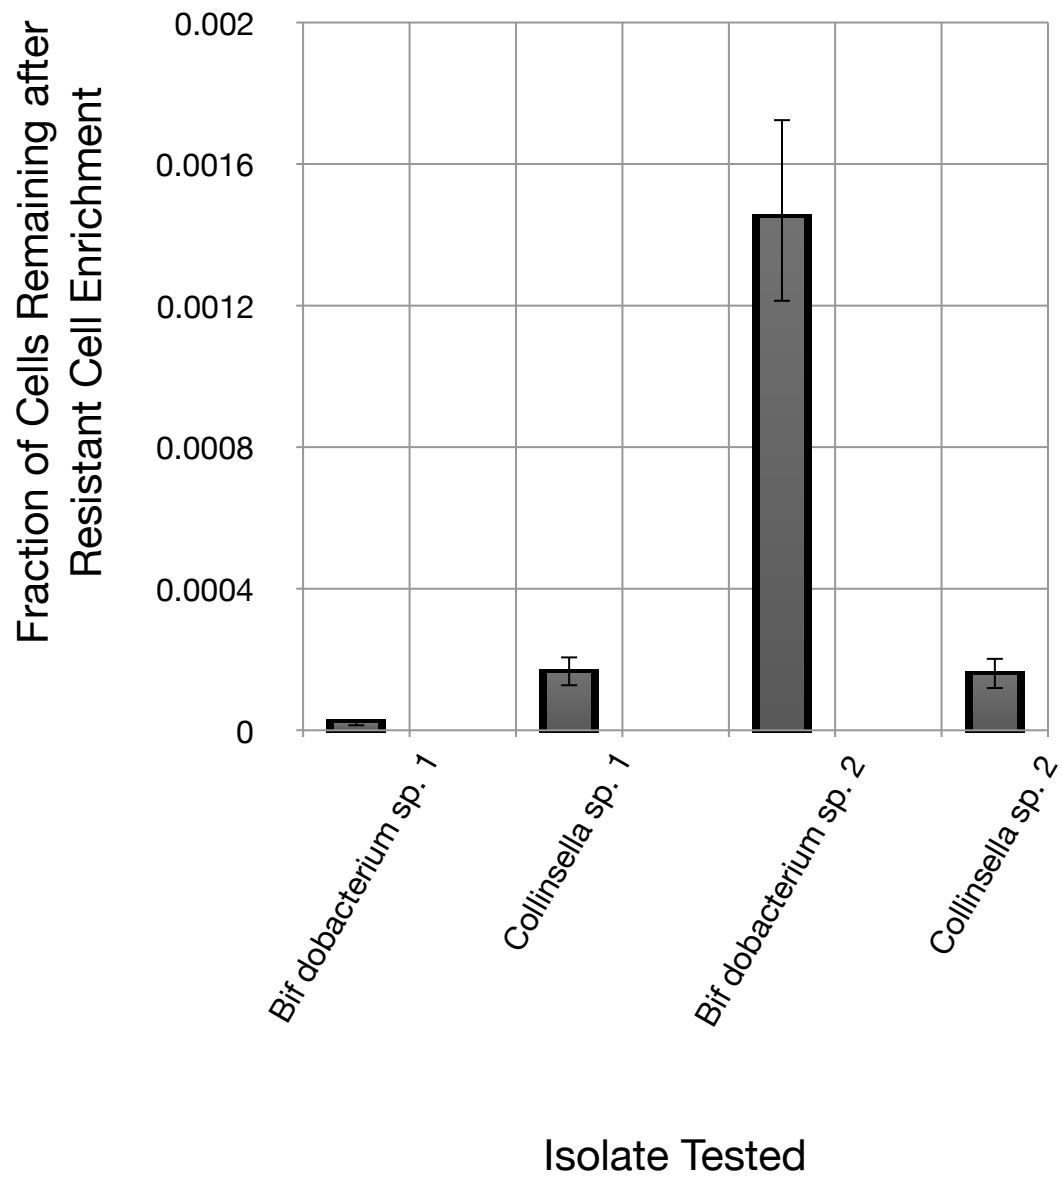

B

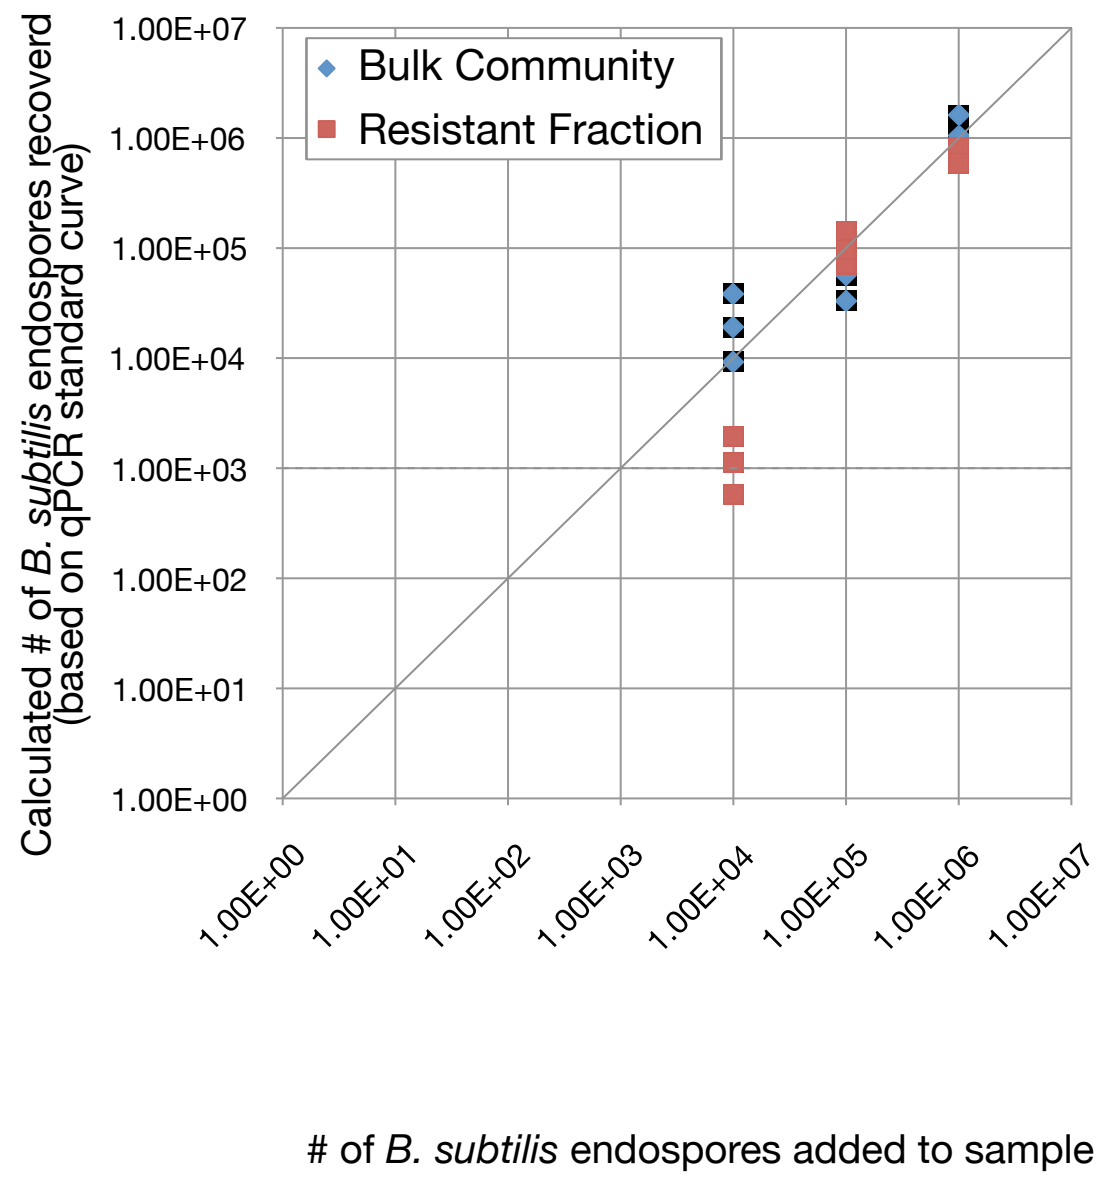

A

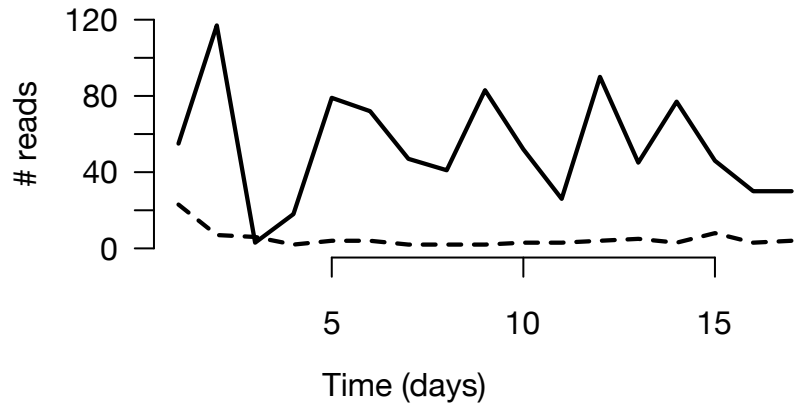

B

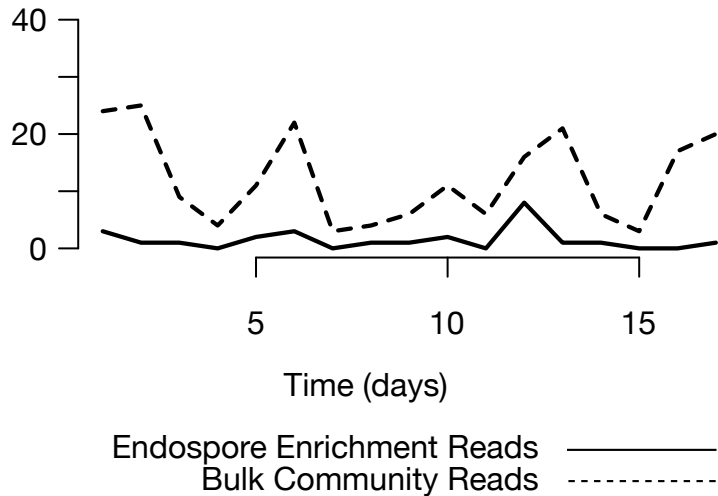

Conserved Sporulation Genes

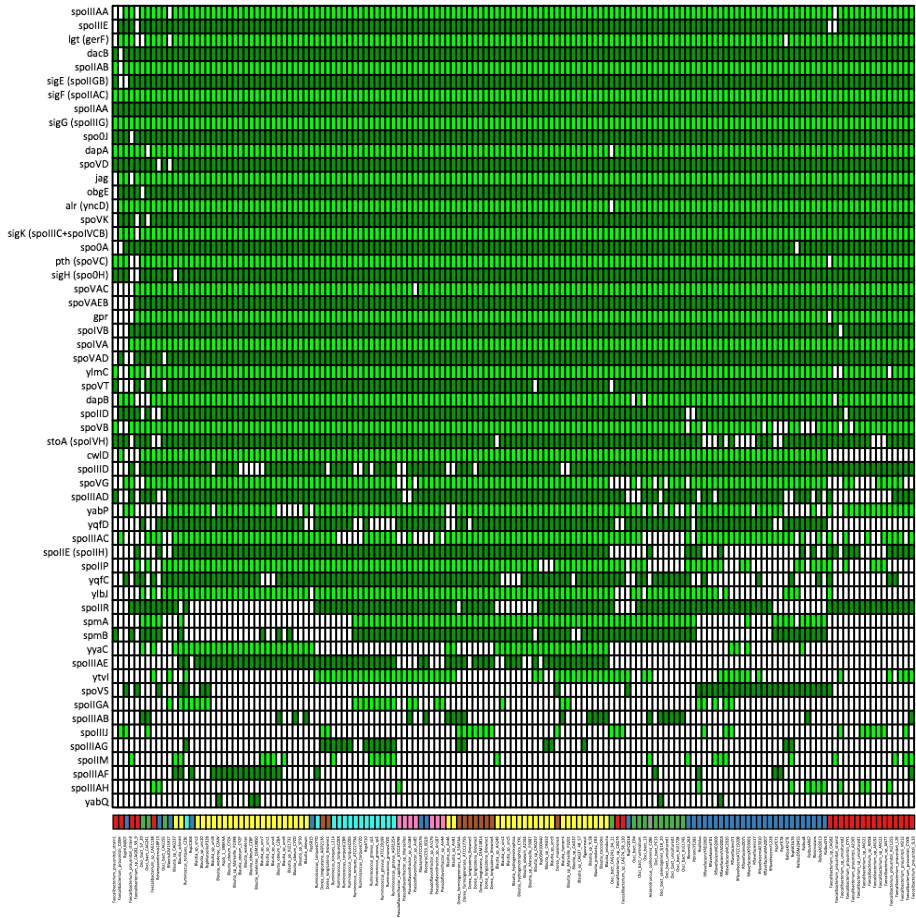

Genera

- Faecalibacterium
- Ruminococcus (Ruminococcaceae)
- Oscillibacter
- Anaerotruncus
- Dorea
- Pseudoflavonifractor
- Blautia
- Ruminococcus (Lachnospiraceae)

Genomes

A

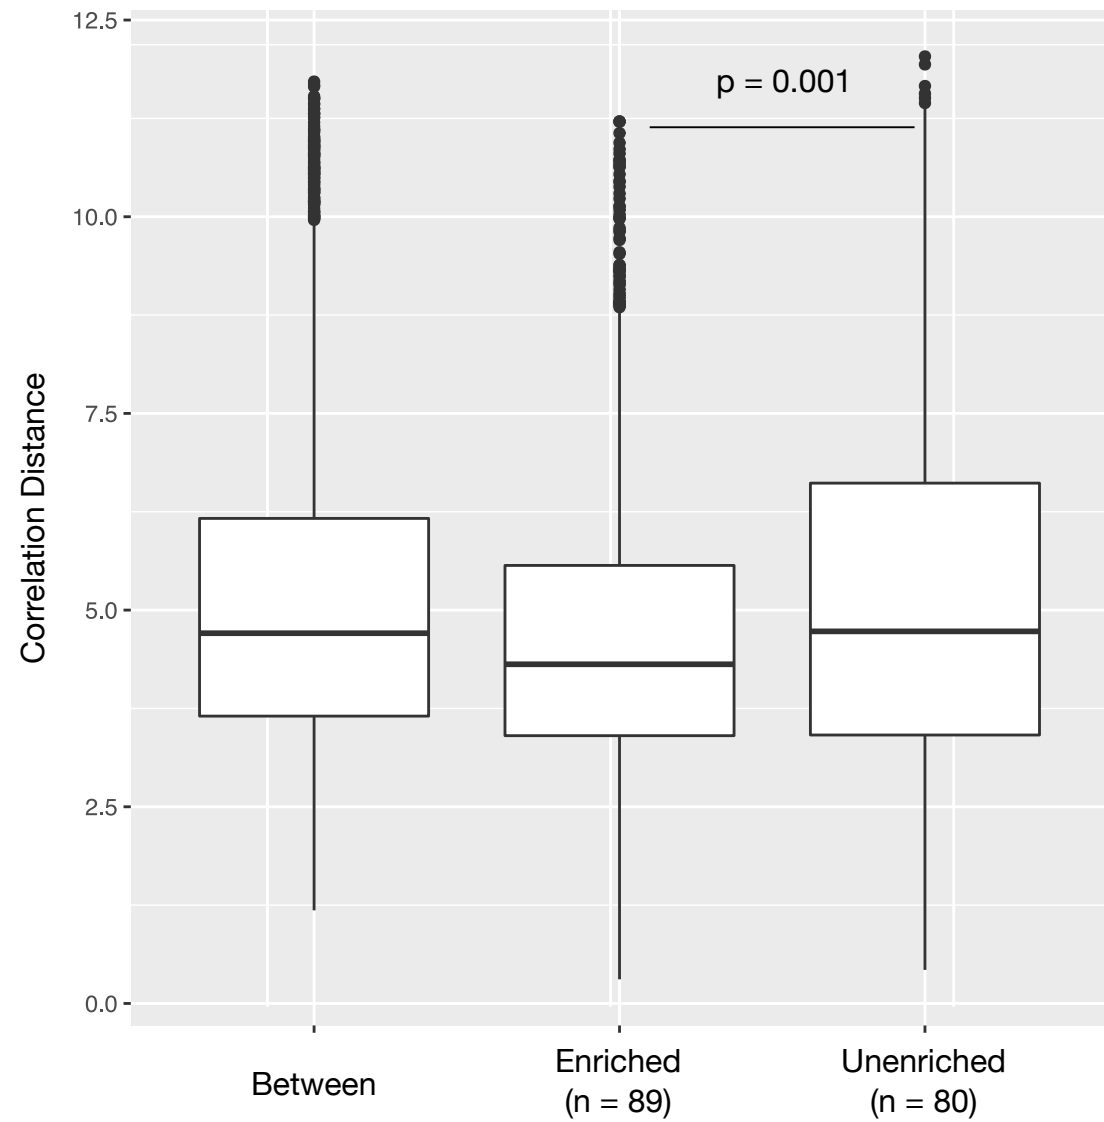

B

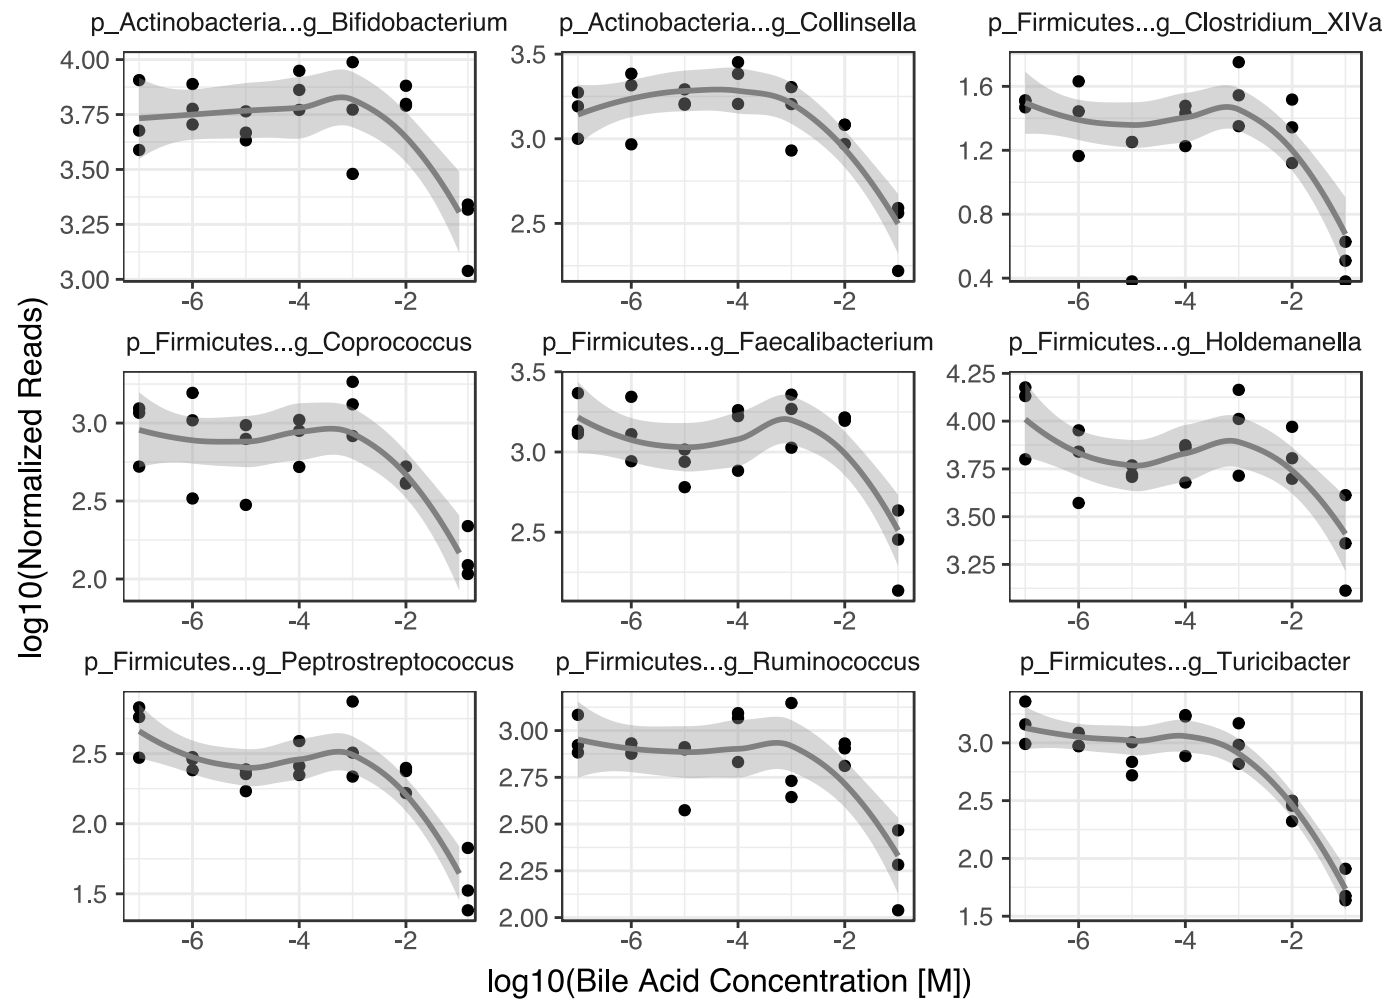

Source: http://biorxiv.org/content/10.1101/221713v2.full.pdf
